1                   **Spatial and regional directory of tropical *Auricularia***  
2                   **mushrooms in Southwest, Nigeria**

3   **Victor S. Ekun<sup>1</sup>, Clementina O. Adenipekun<sup>1</sup>, Omena B. Ojuederie<sup>2</sup> and Peter M. Etaware<sup>1\*</sup>**

4  
5   <sup>1</sup>Department of Botany, Faculty of Science, University of Ibadan, Oyo State, Nigeria

6   <sup>2</sup>Food Security and Safety Niche Area, Faculty of Natural and Agricultural Sciences, North–West  
7   University, Private Bag X2046, Mmabatho, 2735, South Africa

8  
9   \* Corresponding Author

10   Email: peterparkers007@gmail.com; peter.etaware@nmu.edu.ng

11   Orcid No.: <https://orcid.org/0000-0002-9370-8029>

12

13

14

15

16

17

18

## 19 **Abstract**

20 Bioremediation of wastelands and dumpsites in Africa is fast declining due to reduced mushroom  
21 populations. In the past, the forest of Africa was teeming with mushrooms, but nowadays;  
22 mushrooms are severely exploited, resulting in gradual drift to extinction. Mushrooms have the  
23 tendency to degrade recalcitrant wastes and absorb heavy metals (Bio-accumulation). Unless  
24 concerted efforts are made to rejuvenate or rescue the surviving mushroom population, Africa will  
25 one day be overshadowed by wastes. The mushroom diversity in Southwest, Nigeria was  
26 determined by both morphological and molecular markers, 14 primers (OPB-11, OPB-12, OPB-15,  
27 OPB-20, OPB-21, OPH-3, OPH-5, OPH-10, OPH-15, OPT-1, OPT-5, OPT-7, OPT-10 and OPT-  
28 19) produced polymorphism with the test samples under electrophoresis gel (PCR and RAPD).  
29 Using standard morphological markers, *Auricularia auricula* was found to be evenly distributed  
30 across 8 locations in Ekiti and Osun, 6 locations in Ogun, 5 locations in Oyo and 4 locations in  
31 Lagos. There was none identified in Ondo. *Auricularia polytricha* was found in abundance in all the  
32 locations in Ondo. Lagos only had 3 out of its outline Stations graced with the presence of *A.*  
33 *polytricha*, whereas, Ogun, Ekiti, Osun and Oyo had no records of *A. polytricha*. From the genetic  
34 dissimilarity chart, 6 clusters of mushroom, sub-characterized into 3 distinct species (*Auricularia*  
35 *polytricha*, *A. auricula* and an unrelated *Auricularia* outlier species) and 5 cultivars were obtained in  
36 the region of Southwest, Nigeria. The population of all the *Auricularia* mushrooms currently present  
37 in Southwest, Nigeria was effectively captioned (Location, type and identity) by this research.

38 **Keywords:** *Auricularia* Mushrooms; Southwest, Nigeria; Species speciation; Regional diversity;  
39 RT-PCR; RAPD; DNA markers.

40 **Word Count:** 250

## 41 **1.0 Introduction**

42 Mushroom foraging was once considered as a prominent means of generating income for the locals  
43 of West Africa and it was also a pertinent raw material in folklore and traditional medicine (Guissou  
44 *et al.*, 2008). In the past, West Africa was regarded as a major hotspot of mushroom diversity  
45 (Hawksworth, 2004), and as such, the implementation of mushrooms in the bioremediation of  
46 wastelands and dumpsites was considered as a lucrative and environmentally friendly approach,  
47 because mushrooms have the tendency to degrade ligno-cellulosic wastes within a short period of  
48 time and even possess the capacity to bio-accumulate and harness a vast array of heavy metals from  
49 the soil (Adenipekun *et al.*, 2015). Mushrooms are majorly found in the wild (Osemwegie *et al.*,  
50 2014), or close to human settlements (Crous *et al.*, 2006).

51 Mushrooms are currently threatened by extinction due to the massive destruction of their natural  
52 habitat (The wild) by natural disasters e.g. bush fire, earth quake, tornado etc., or by human  
53 intervention for their selfish interest e.g. construction of schools, hospitals, industries, houses, sport  
54 centres etc. (Gateri *et al.*, 2004) and overgrazing by animals/humans. Mushroom domestication was  
55 the first line of action taken by ancient man to secure, safeguard, preserve and conserve mushroom  
56 species from extinction. One of the most economically important genera of the mushroom family is  
57 “*Auricularia* mushroom”, they are mostly edible mushroom of global repute with only about 17%  
58 global production, currently ranked 3<sup>rd</sup> as the most cultivated mushroom genus after *Lentinula*  
59 (22%) and *Pleurotus* (19%) (Royse *et al.*, 2017; Bandara *et al.*, 2019).

60 The genus *Auricularia* belongs to the family *Auriculariaceae*, class *Agaricomycetes*, phylum  
61 *Basidiomycota* and kingdom *Fungi* (Moore *et al.*, 2001; Moore 2013). Several species exist within

62 the fungi order “*Auriculariales*” that are useful as both edible and medicinal mushrooms (Chang  
63 and Hayes, 2013). *Auricularia* mushrooms are widespread throughout the temperate and sub-  
64 tropical zones of the world, and can be found across Europe, North America, Asia, and Australia  
65 (Conte and Laessoe, 2008). It has been reported that there are only 15-20 species of *Auricularia*  
66 worldwide with 8 species identified in China (Chang and Miles, 2004). Among these species, *A.*  
67 *auricula* and *A. polytricha* are the most popular and the most cultivated around the world (Chang  
68 and Miles, 2004). *Auricularia auricula* commonly known as wood ear mushrooms is native to  
69 Kenya and occurs in Kakamega forest in Western Kenya. In other parts of Africa, the wood ear  
70 mushrooms have been reported in Nigeria where it is being conserved through cultivation on palm  
71 substrates (Osemwegie and Okhuoya, 2009). In Kenya, the wood ears have not been previously  
72 cultivated because they are protected by wildlife conservation laws.

73 According to Osemwegie *et al.* (2014), proper inventory of wild or domesticated edible mushrooms  
74 with high medicinal values, sold in local markets is required for the development of a mushroom  
75 genetic resource or germplasm, a database for differentiating between toxic and edible mushrooms,  
76 and the cultivation of species yet uncultivated. Above all, the safety of life and a decline in the cases  
77 of “Mycotoxicosis” resulting in human and wildlife casualty is of paramount global interest. The  
78 dearth of information regarding the domestication and cultivation of mushrooms (Mushroom  
79 technology) became the major cause for dependence on mushroom hunting/foraging, practiced by  
80 the indigenous people of Africa. The common way to identify different *Auricularia* species was  
81 based on morphological characters such as size, shape and colour of the fruiting body etc. Musngi *et*  
82 *al.* (2004) effectively classified various strains of *Auricularia* spp in the Philippines by simply using  
83 phenotypic characters.

84 The use of morphological markers only for characterization of *Auricularia* species found in  
85 Southwest, Nigeria is largely unreliable, misleading and ineffective because it has several  
86 limitations which abound majorly due to the adverse effects and intricate influence of environmental  
87 factors (Etaware *et al.*, 2020) on the phenotype or physical appearance of similar mushrooms  
88 species grown under different environmental conditions. Therefore, the use of molecular markers  
89 (PCR and RAPD) to determine the genetic diversity and variation among large genomic entity of  
90 *Auricularia* mushrooms with similar gene pool is an added advantage, a more reliable and valuable  
91 tool that can detect the slightest trace of genetic variability, which is the basis for characterization  
92 and classification of these species into a more organized taxa (Al-Gabbiesh *et al.*, 2006).

93 Finally, a comprehensive knowledge of the varietal differences that exist within the genus, species  
94 and sub-species of the *Auricularia* mushroom can be exploited by the use of molecular markers,  
95 which will inferably serve as sources of cell lines for researchers and in-breeding programs within  
96 Africa and around the world (Pei-Sheng and Chang, 2004). Inferably without an aorta of doubt, one  
97 can surmise that the inability to effectively distinguish between poisonous and edible mushroom  
98 may also have accounted for the visible underdevelopment in global mushroom cultivation which  
99 has undermined the commercial scale production of edible and medicinal mushrooms for decades  
100 unending leading to low priority export or impact on foreign exchange earnings.

## 101 **2.0 Materials and Methods**

### 102 **2.1 Spatial grouping (Stereotype and Catalogue) of *Auricularia* sp.**

103 A total of fifty four (54) sample stations was setup across Southwest, Nigeria for the sole purpose of  
104 efficiency and accuracy in the catalogue of wild *Auricularia* mushrooms in the tropical, sub-

105 tropical, and rain forest region of Southwest, Nigeria (See Table 1-6 for comprehensive details).  
 106 Field assessment was conducted regularly between September 2011 and July 2012. The  
 107 geographical view of Southwest, Nigeria was described in Fig 1. The coordinates and geographical  
 108 identity of each sample station was referenced in Table 1-6. Prospective *Auricularia* samples were  
 109 identified at the Department of Botany, University of Ibadan, Ibadan, Oyo State, Nigeria, based on  
 110 the recommended phenotypic behaviours (colour, shape, texture, and fruit body) given by Musngi *et*  
 111 *al.* (2004).

112 **Fig 1. The geographical positioning of the States that comprises Southwestern Nigeria**  
 113

114 **Table 1:** The coordinates and location of sample stations in Ogun State, Southwest-Nigeria

| S/N | Stations | Code | Local Govt. Area | Town      | State | Latitude | Longitude |
|-----|----------|------|------------------|-----------|-------|----------|-----------|
| 1   | 01       | OG1  | Abeokuta North   | Abeokuta  | Ogun  | 7.1475°N | 3.3619°E  |
| 2   | 02       | OG2  | Ewekoro          | Itori     | Ogun  | 6.9530°N | 3.2181°E  |
| 3   | 03       | OG3  | Ifo              | Ifo       | Ogun  | 6.8192°N | 3.1930°E  |
| 4   | 04       | OG4  | Ijebu Ode        | Ijebu Ode | Ogun  | 6.8300°N | 3.9165°E  |
| 5   | 05       | OG5  | Ikenne           | Ikenne    | Ogun  | 6.8717°N | 3.7105°E  |
| 6   | 06       | OG6  | Shagamu          | Shagamu   | Ogun  | 6.8322°N | 3.6319°E  |
| 7   | 07       | OG7  | Odeda            | Odeda     | Ogun  | 7.2328°N | 3.5281°E  |
| 8   | 08       | OG8  | Odogbolu         | Odogbolu  | Ogun  | 6.8365°N | 3.7689°E  |

115 State Code: OG→Ogun  → No *Auricularia* specimen found in that region

116

117 **Table 2:** The coordinates and location of sample stations in Lagos State, Southwest-Nigeria

| S/N | Stations | Code | Local Govt. Area | Town    | State | Latitude | Longitude |
|-----|----------|------|------------------|---------|-------|----------|-----------|
| 1   | 09       | LA1  | Agege            | Ikeja   | Lagos | 6.6180°N | 3.3209°E  |
| 2   | 10       | LA2  | Ojo              | Ojo     | Lagos | 6.4579°N | 3.1580°E  |
| 3   | 11       | LA3  | Apapa            | Ikeja   | Lagos | 6.4553°N | 3.3641°E  |
| 4   | 12       | LA4  | Badagry          | Badagry | Lagos | 6.4316°N | 2.8876°E  |
| 5   | 13       | LA5  | Epe              | Epe     | Lagos | 6.6055°N | 3.9470°E  |
| 6   | 14       | LA6  | Shomolu          | Shomolu | Lagos | 6.5392°N | 3.3842°E  |
| 7   | 15       | LA7  | Ikorodu          | Ikorodu | Lagos | 6.6194°N | 3.5105°E  |
| 8   | 16       | LA8  | Mushin           | Ikeja   | Lagos | 6.5273°N | 3.3414°E  |

118 State Code: LA→Lagos  → No *Auricularia* specimen found in that region

119 **Table 3:** The coordinates and location of sample stations in Oyo State, Southwest-Nigeria

| S/N | Stations | Code | Local Govt. Area | Town       | State | Latitude | Longitude |
|-----|----------|------|------------------|------------|-------|----------|-----------|
| 1   | 17       | OY1  | Akinyele         | Moniya     | Oyo   | 7.5249°N | 3.9152°E  |
| 2   | 18       | OY2  | Egbeda           | Egbeda     | Oyo   | 7.3796°N | 3.9675°E  |
| 3   | 19       | OY3  | Ido              | Ido        | Oyo   | 7.5077°N | 3.7194°E  |
| 4   | 20       | OY4  | Iseyin           | Iseyin     | Oyo   | 7.9765°N | 3.5914°E  |
| 5   | 21       | OY5  | Ogbomosho North  | Ogbomosho  | Oyo   | 8.1227°N | 4.2436°E  |
| 6   | 22       | OY6  | Oluyole          | Idi Ayunre | Oyo   | 7.2247°N | 3.8732°E  |
| 7   | 23       | OY7  | Oyo              | Oyo        | Oyo   | 7.8430°N | 3.9368°E  |
| 8   | 24       | OY8  | Olorunsogo       | Igbeti     | Oyo   | 8.7699°N | 4.1104°E  |
| 9   | 52       | OY9  | Akinyele         | Ojo        | Oyo   | 7.5503°N | 3.9470°E  |
| 10  | 53       | OY10 | Ibadan North     | Bodija     | Oyo   | 7.4351°N | 3.9143°E  |

120 State Code: OY→Oyo  → No *Auricularia* specimen found in that region

121

122 **Table 4:** The coordinates and location of sample stations in Ekiti State, Southwest-Nigeria

| S/N | Stations | Code | Local Govt. Area | Town        | State | Latitude | Longitude |
|-----|----------|------|------------------|-------------|-------|----------|-----------|
| 1   | 25       | EK1  | Ado Ekiti        | Ado Ekiti   | Ekiti | 7.6124°N | 5.2371°E  |
| 2   | 26       | EK2  | Ilejemeje        | Iye         | Ekiti | 7.9591°N | 5.2371°E  |
| 3   | 27       | EK3  | Ikole            | Ikole       | Ekiti | 7.7983°N | 5.5145°E  |
| 4   | 28       | EK4  | Oye              | Oye         | Ekiti | 7.7979°N | 5.3286°E  |
| 5   | 29       | EK5  | Irepodun         | Igede       | Ekiti | 7.7313°N | 5.2476°E  |
| 6   | 30       | EK6  | Ikere            | Ikere       | Ekiti | 7.4991°N | 5.2319°E  |
| 7   | 31       | EK7  | Ijero            | Ijero Ekiti | Ekiti | 7.8120°N | 5.0677°E  |
| 8   | 32       | EK8  | Emure            | Emure Ekiti | Ekiti | 7.4317°N | 5.4621°E  |

123 State Code: EK→Ekiti  → No *Auricularia* specimen found in that region

124

125 **Table 5:** The coordinates and location of sample stations in Ondo State, Southwest-Nigeria

| S/N | Stations | Code | Local Govt. Area | Town       | State | Latitude | Longitude |
|-----|----------|------|------------------|------------|-------|----------|-----------|
| 1   | 33       | OD1  | Idanre           | Idanre     | Ondo  | 7.0914°N | 5.1484°E  |
| 2   | 34       | OD2  | Ilaje            | Igbokoda   | Ondo  | 6.2585°N | 4.7692°E  |
| 3   | 35       | OD3  | Ile Oluji        | Ile Oluji  | Ondo  | 7.2825°N | 4.8521°E  |
| 4   | 36       | OD4  | Odigbo           | Ore        | Ondo  | 6.7519°N | 4.8780°E  |
| 5   | 37       | OD5  | Okitipupa        | Okitipupa  | Ondo  | 6.5025°N | 4.7795°E  |
| 6   | 38       | OD6  | Ose              | Ifon       | Ondo  | 6.9235°N | 5.7774°E  |
| 7   | 39       | OD7  | Owo              | Owo        | Ondo  | 7.1989°N | 5.5932°E  |
| 8   | 40       | OD8  | Ifedore          | Igbara Oke | Ondo  | 7.3877°N | 5.0807°E  |
| 9   | 54       | OD9  | Akure South      | Akure      | Ondo  | 7.2571°N | 5.2058°E  |

126 State Code: OD→Ondo  → No *Auricularia* specimen found in that region

127

128 **Table 6:** The coordinates and location of sample stations in Osun State, Southwest-Nigeria

| S/N | Stations | Code | Local Govt. Area | Town            | State | Latitude | Longitude |
|-----|----------|------|------------------|-----------------|-------|----------|-----------|
| 1   | 41       | OS1  | Bolunduro        | Ota Aiyebaju    | Osun  | 7.5912°N | 4.7329°E  |
| 2   | 42       | OS2  | Ejigbo           | Ejigbo          | Osun  | 7.9045°N | 4.3052°E  |
| 3   | 43       | OS3  | Ifedayo          | Oke Ila Orangun | Osun  | 7.9946°N | 4.9974°E  |
| 4   | 44       | OS4  | Ifelodun         | Ikirun          | Osun  | 7.9227°N | 4.6347°E  |
| 5   | 45       | OS5  | Ila              | Ila Orangun     | Osun  | 8.0121°N | 4.8988°E  |
| 6   | 46       | OS6  | Irepodun         | Ilobu           | Osun  | 7.9021°N | 4.5315°E  |
| 7   | 47       | OS7  | Iwo              | Iwo             | Osun  | 7.6292°N | 4.1872°E  |
| 8   | 48       | OS8  | Obokun           | Ibokun          | Osun  | 7.8019°N | 4.7692°E  |
| 9   | 49       | OS9  | Irewole          | Ikire           | Osun  | 7.3700°N | 4.1872°E  |
| 10  | 50       | OS10 | Oriade           | Ilesha          | Osun  | 7.6395°N | 4.7588°E  |
| 11  | 51       | OS11 | Oriade           | Ipetu Ijesha    | Osun  | 7.4273°N | 4.9091°E  |

129 State Code: OS→Osun  → No *Auricularia* specimen found in that region

130

## 131 **2.2 Morphological characterization of prospective *Auricularia* sp.**

132 The basidiocarps were rehydrated by soaking in water for 10 minutes before characterization.

133 Qualitative characters such as colour, shape, and presence of hymenia was evaluated by physical

134 observation while texture was determined by touching the back and top surfaces (Onyango *et al.*,

135 2011). For microscopic characters, free hand transverse sections of approximately 0.1 mm thick

136 were made from rehydrated basidiocarps with the aid of a sharp surgical blade. The sections were

137 immersed in a diluted solution of methylene blue stain and left for 10 minutes. Thin sections were

138 selected and placed on glass slides, fitted with cover slips and the anatomy of each basidiocarp was

139 studied. The characterization of *Auricularia* spp based on morphological markers (Colour, Shape,

140 and Texture etc. of both the mycelia and entire mushroom body) was described in Table 7.

141

142

143



144 **Table 7:** Classification of *Auricularia* species using morphological markers

| Case | External Mushroom Features |           |            | Mycelia Features |         | Inference          |                   |
|------|----------------------------|-----------|------------|------------------|---------|--------------------|-------------------|
|      | Colour                     | Shape     | Texture    | Colour           | Type    | Genus              | Species           |
| 1    | Dark brown                 | Discoïd   | Gelatinous | White            | Cottony | <i>Auricularia</i> | Unknown           |
| 2    | Yellow brown               | Auriform  | Leathery   | Off white        | Cottony | <i>Auricularia</i> | <i>auricula</i>   |
| 3    | Brown                      | Flattened | Rubbery    | Off white        | Scanty  | <i>Auricularia</i> | <i>Unknown</i>    |
| 4    | Dark brown                 | Discoïd   | Gelatinous | White            | Cottony | <i>Auricularia</i> | <i>polytricha</i> |

145 A modified protocol adapted from Onyango *et al.* (2011)

146

## 147 **2.3 Molecular characterization of prospective *Auricularia* sp.**

### 148 **2.3.1 Tissue preparation and DNA Extraction**

149 The modified DNA extraction protocol of Chen *et al.* (2010), involving the use of  
150 Cetyltrimethylammonium Bromide (CTAB), was used for DNA isolation. Tissues from the pileus of  
151 each mushroom specimens was aseptically detached using a sterile scalpel and 200mg was weighed  
152 out prior to DNA extraction. The tissues was pulverized with 800ml of CTAB buffer (20 mM  
153 EDTA, 1.4 mM NaCl, 100 mM Tris-HCl pH 8.0, SDS (1.25%, 2% CTAB and 0.2%  $\beta$ -  
154 mercaptoethanol (v/v)), incubated at 65°C for 15 min using water bath with intermittent  
155 homogenization, allowed to cool for approximately 1 min before adding equal volume of phenol,  
156 chloroform and iso-amyl alcohol at the ratio of 25:24:1.

157 The mixture was further centrifuged at 12,000 revolutions per minute (rpm) for 15 minutes; the  
158 supernatant was transferred to clean sterile tubes without unsettling the pellets. About 400  $\mu$ l of ice-  
159 cold isopropanol was added to the supernatant and mixed by inverting the tubes 2-5 times to

160 precipitate the DNA and subsequently kept at -80°C for 1hr. The DNA sediment was pelleted by  
161 centrifugation at 12,000 rpm for 10 min and the dried DNA pellets obtained were re-suspended in  
162 100 µl of Grand Island Biological Company (GIBCO) water (Invitrogen, Carlsbad, CA, USA) and 2  
163 µl of 10 mg/ml RNase (Qiagen Valencia, CA, USA) was added to each of the samples and kept at  
164 4°C for 30 minutes to remove fragments of RNA strands.

### 165 **2.3.2 DNA Sequencing**

166 The extracted DNA fragments from each Auricularia mushroom specimen was sequenced using the  
167 high-throughput Sequencing (HTS) or Next Generation Sequencing (NGS) Technique. A total of  
168 2.5µl of the stock DNA samples were loaded on 1.5% agarose gel for electrophoresis and visualized  
169 under UV light (Model-2, Upland, CA, USA) to check the quality of the extracted DNA samples.  
170 Following the high level of concentration of the extracted DNA samples, dilution of each DNA  
171 sample was uniformly made to 100ng/uL DNA.

### 172 **2.3.3 DNA Purification and Quantification**

173 The sequenced DNA fragments were quantified using Nano-Drop spectrophotometer (ND-1000).  
174 About 2µl of the extracted DNA sample was used to obtain a unique ration of 1.8:2.0 at OD  
175 260/280 absorbance level and concentration through which dilution samples were prepared for  
176 polymerase chain reaction (PCR).

177 *Mathematically,*

$$178 \quad \text{The Optical Density (OD)} = \text{Log}_{10} \frac{\text{Intensity of Incident Light}}{\text{Intensity of transmitted Light}}$$

$$179 \quad \text{OD}_{260/280} (A_{260/280}) = \text{Log}_{10} \frac{I_{LL}}{I_{TL}}$$

## 180 **2.3.4 DNA/RNA primer selection and buffer preparation**

181 A total of twenty five (25) primers were subjected to screening for polymorphism with the  
182 prospective *Auricularia* species (i.e. OPB-1, OPB-2, OPB-3, OPB-4, OPB-5, OPB-6, OPB-7, OPB-  
183 8, OPB-9, OPB-10, OPB-11, OPB-12, OPB-15, OPB-20, OPB-21, OPH-3, OPH-5, OPH-10, OPH-  
184 15, OPT-1, OPT-5, OPT-7, OPT-10, OPT-19 and OPD-18) out of which fourteen (14) primers were  
185 polymorphic (OPB-11, OPB-12, OPB-15, OPB-20, OPB-21, OPH-3, OPH-5, OPH-10, OPH-15,  
186 OPT-1, OPT-5, OPT-7, OPT-10 and OPT-19) as shown in Table 8. The fourteen (14) arbitrary  
187 RAPD decamer primers (Table 8) obtained from Operon Technology (Alameda, CA, USA) were  
188 used for PCR amplification.

189 **Table 8:** Primers used for DNA amplification during molecular analysis

| S/N | RAPD primer | DNA/RNA Primer Sequence                  | Melting Point (T <sub>m</sub> °C) |
|-----|-------------|------------------------------------------|-----------------------------------|
| 1   | OPB-11      | 5 <sup>1</sup> GTAGACCCGT 3 <sup>1</sup> | 34                                |
| 2   | OPB-12      | 5 <sup>1</sup> CGTTGACGCA 3 <sup>1</sup> | 34                                |
| 3   | OPB-15      | 5 <sup>1</sup> GGAGGGTGTT 3 <sup>1</sup> | 32                                |
| 4   | OPB-20      | 5 <sup>1</sup> GGACCCTTAC 3 <sup>1</sup> | 34                                |
| 5   | OPB-21      | 5 <sup>1</sup> CGACCCTTAC 3 <sup>1</sup> | 34                                |
| 6   | OPH-3       | 5 <sup>1</sup> AGACGTCCAC 3 <sup>1</sup> | 34                                |
| 7   | OPH-5       | 5 <sup>1</sup> AGTCGTCCCC 3 <sup>1</sup> | 32                                |
| 8   | OPH-10      | 5 <sup>1</sup> CCTACGTCAG 3 <sup>1</sup> | 32                                |
| 9   | OPH-15      | 5 <sup>1</sup> GCTTCGTCAG 3 <sup>1</sup> | 34                                |
| 10  | OPT-1       | 5 <sup>1</sup> GGGCCACTCA 3 <sup>1</sup> | 34                                |
| 11  | OPT-5       | 5 <sup>1</sup> GGGTTTGGCA 3 <sup>1</sup> | 32                                |
| 12  | OPT-7       | 5 <sup>1</sup> GGCAGGCTGT 3 <sup>1</sup> | 34                                |
| 13  | OPT-10      | 5 <sup>1</sup> CCTTCGGAAG 3 <sup>1</sup> | 32                                |
| 14  | OPT-19      | 5 <sup>1</sup> GATGCCAGAC 3 <sup>1</sup> | 32                                |

190 Operon Technology, Alameda, California, USA

### 191 **2.3.5 PCR Analysis (DNA Amplification and Fingerprinting)**

192 The required capacity for PCR amplification was 25 $\mu$ l i.e. 2.0 $\mu$ l of 100ng DNA, 2.5 $\mu$ l of 10 x  
193 Buffer (Bioline), 1.25 $\mu$ l of 50mM MgCl<sub>2</sub> (Bioline), 2.0 $\mu$ l of 2.5mM dNTPs (Bioline), and 0.2 $\mu$ l  
194 500U *Taq* DNA polymerase (Bioline), 1.0 $\mu$ l DMSO (dimethyl sulfoxide), 1.0 $\mu$ l of 10uM of each  
195 primer and 16.05 $\mu$ l of 500ml DEPC-treated water (Invitrogen Corporation). PCR amplifications  
196 were performed using Applied Bio-systems thermo-cycler with a cycling profile of an initial step of  
197 94°C for 2 minutes, 40 cycles of 94°C for 20 s, 72°C for 1min, and 54°C for 2 mins., and a 5-min  
198 final extension at 72°C.

### 199 **2.3.6 RAPD profiling using electrophoresis gel**

200 Amplified fragments were separated by electrophoresis on 1.5% (w/v) agarose (Sigma Aldrich,  
201 USA) gels with 1X TBE (Tris-Boric acid-EDTA) buffer and stained with ethidium bromide  
202 (0.5mg/ml). The molecular fragments were estimated using 100-bp step DNA marker (Bio-labs,  
203 New England).

## 204 **2.4 Statistical Analysis**

205 Data matrix generated from the RAPD sequence for fragments of similar molecular weight from  
206 each individual mushroom specimens were scored as present (1) or absent (0). The data obtained  
207 from scoring the RAPD bands were used to determine the genetic dissimilarity matrix using  
208 Jaccard's similarity coefficient (Jaccard 1908 Standard Protocol). Phylogenetic relations were  
209 determined by cluster analysis using UGPMA (un-weighted pair-group method with arithmetic  
210 averages) aided by the NTSYS-pc software version 2.02 (Rohlf 1998 Preferred Protocol).  
211 Phylogenetic characterization into multivariate groups was done using principal component analysis

212 (PCA) with Darwin software version 5.0.0.157 while polymorphic information content (PIC) was  
213 calculated using the method of Botstein *et al.* (1980). The data obtained were analyzed using a one  
214 way analysis of variance (ANOVA) aided by SPSS v20. Significantly different means were  
215 separated using Tukey test at  $P < 0.05$

216

## 217 **3.0 Results**

### 218 **3.1 Geo-mapping of *Auricularia* sp. in Southwest, Nigeria**

219 A total of 31 samples of *Auricularia auricula* were identified and geo-tagged at several strategic  
220 locations within Southwest, Nigeria (See Table 9-14 for more details). *Auricularia auricula* was  
221 evenly distributed across 8 sample Stations in Ekiti (Table 12) and Osun (Table 14) States, 6  
222 locations in Ogun State (Table 9), 5 Stations in Oyo State (Table 11) and 4 locations in Lagos State  
223 (Table 10). There was none identified in Ondo State (Table 13) as at the time of filing this reports.  
224 *Auricularia polytricha* was found in abundance in Ondo State i.e. it was evenly distributed around 8  
225 strategic locations within the State (Table 13). Lagos State only had 3 out of its outline Stations  
226 graced with the presence of *A. polytricha* (Table 10). Ogun, Ekiti, Osun and Oyo States had no  
227 records of *A. polytricha* i.e. the mushroom was not found within their forest domain prior to the  
228 compilation of this report. About 5 species from the genus *Auricularia* found in Ogun (Table 9),  
229 Lagos (Table 10) and Oyo (Table 11) States were not identified to their species level due to  
230 discrepancy in their morphological status.

231

232

233 **Table 9:** Geo-mapping of *Auricularia* species in Ogun, Nigeria based on morphological characters

| Tag     |      | Location         |           | GPS Coordinate |           | Status             |                 |
|---------|------|------------------|-----------|----------------|-----------|--------------------|-----------------|
| Station | Code | Local Govt. Area | Town      | Latitude       | Longitude | Genus              | Species         |
| 01      | OG1  | Abeokuta North   | Abeokuta  | 7.1475°N       | 3.3619°E  | <i>Auricularia</i> | Unknown         |
| 02      | OG2  | Ewekoro          | Itori     | 6.9530°N       | 3.2181°E  | <i>Auricularia</i> | Unknown         |
| 03      | OG3  | Ifo              | Ifo       | 6.8192°N       | 3.1930°E  | <i>Auricularia</i> | <i>auricula</i> |
| 04      | OG4  | Ijebu Ode        | Ijebu Ode | 6.8300°N       | 3.9165°E  | <i>Auricularia</i> | <i>auricula</i> |
| 05      | OG5  | Ikenne           | Ikenne    | 6.8717°N       | 3.7105°E  | <i>Auricularia</i> | <i>auricula</i> |
| 06      | OG6  | Shagamu          | Shagamu   | 6.8322°N       | 3.6319°E  | <i>Auricularia</i> | <i>auricula</i> |
| 07      | OG7  | Odeda            | Odeda     | 7.2328°N       | 3.5281°E  | <i>Auricularia</i> | <i>auricula</i> |
| 08      | OG8  | Odogbolu         | Odogbolu  | 6.8365°N       | 3.7689°E  | <i>Auricularia</i> | <i>auricula</i> |

234 State Code: OG→Ogun  → No *Auricularia* specimen found in that region

235

236 **Table 10:** Geo-mapping of *Auricularia* species in Lagos, Nigeria based on morphological characters

| Tag     |      | Location         |         | GPS Coordinate |           | Status             |                   |
|---------|------|------------------|---------|----------------|-----------|--------------------|-------------------|
| Station | Code | Local Govt. Area | Town    | Latitude       | Longitude | Genus              | Species           |
| 09      | LA1  | Agege            | Ikeja   | 6.6180°N       | 3.3209°E  | <i>Auricularia</i> | <i>auricula</i>   |
| 10      | LA2  | Ojo              | Ojo     | 6.4579°N       | 3.1580°E  | <i>Auricularia</i> | <i>auricula</i>   |
| 11      | LA3  | Apapa            | Ikeja   | 6.4553°N       | 3.3641°E  | <i>Auricularia</i> | <i>auricula</i>   |
| 12      | LA4  | Badagry          | Badagry | 6.4316°N       | 2.8876°E  | <i>Auricularia</i> | <i>auricula</i>   |
| 13      | LA5  | Epe              | Epe     | 6.6055°N       | 3.9470°E  | <i>Auricularia</i> | Unknown           |
| 14      | LA6  | Shomolu          | Shomolu | 6.5392°N       | 3.3842°E  | <i>Auricularia</i> | <i>polytricha</i> |
| 15      | LA7  | Ikorodu          | Ikorodu | 6.6194°N       | 3.5105°E  | <i>Auricularia</i> | <i>polytricha</i> |
| 16      | LA8  | Mushin           | Ikeja   | 6.5273°N       | 3.3414°E  | <i>Auricularia</i> | <i>polytricha</i> |

237 State Code: LA→Lagos  → No *Auricularia* specimen found in that region

238

239 **Table 11:** Geo-mapping of *Auricularia* species in Oyo, Nigeria based on morphological characters

| Tag     |      | Location         |            | GPS Coordinate |           | Status             |                   |
|---------|------|------------------|------------|----------------|-----------|--------------------|-------------------|
| Station | Code | Local Govt. Area | Town       | Latitude       | Longitude | Genus              | Species           |
| 17      | OY1  | Akinyele         | Moniya     | 7.5249°N       | 3.9152°E  | <i>Auricularia</i> | <i>polytricha</i> |
| 18      | OY2  | Egbeda           | Egbeda     | 7.3796°N       | 3.9675°E  | <i>Auricularia</i> | <i>auricula</i>   |
| 19      | OY3  | Ido              | Ido        | 7.5077°N       | 3.7194°E  | <i>Auricularia</i> | Unknown           |
| 20      | OY4  | Iseyin           | Iseyin     | 7.9765°N       | 3.5914°E  | <i>Auricularia</i> | Unknown           |
| 21      | OY5  | Ogbomosho North  | Ogbomosho  | 8.1227°N       | 4.2436°E  | <i>Auricularia</i> | <i>auricula</i>   |
| 22      | OY6  | Oluyole          | Idi Ayunre | 7.2247°N       | 3.8732°E  | <i>Auricularia</i> | <i>auricula</i>   |
| 23      | OY7  | Oyo              | Oyo        | 7.8430°N       | 3.9368°E  | <i>Auricularia</i> | <i>auricula</i>   |
| 24      | OY8  | Olorunsogo       | Igbeti     | 8.7699°N       | 4.1104°E  | <i>Auricularia</i> | <i>auricula</i>   |
| 52      | OY9  | Akinyele         | Ojo        | 7.5503°N       | 3.9470°E  | None               | None              |
| 53      | OY10 | Ibadan North     | Bodija     | 7.4351°N       | 3.9143°E  | None               | None              |

240 State Code: OY→Oyo  → No *Auricularia* specimen found in that region

241 **Table 12:** Geo-mapping of *Auricularia* species in Ekiti, Nigeria based on morphological characters

| Tag     |      | Location         |             | GPS Coordinate |           | Status             |                 |
|---------|------|------------------|-------------|----------------|-----------|--------------------|-----------------|
| Station | Code | Local Govt. Area | Town        | Latitude       | Longitude | Genus              | Species         |
| 25      | EK1  | Ado Ekiti        | Ado Ekiti   | 7.6124°N       | 5.2371°E  | <i>Auricularia</i> | <i>auricula</i> |
| 26      | EK2  | Ilejemeje        | Iye         | 7.9591°N       | 5.2371°E  | <i>Auricularia</i> | <i>auricula</i> |
| 27      | EK3  | Ikole            | Ikole       | 7.7983°N       | 5.5145°E  | <i>Auricularia</i> | <i>auricula</i> |
| 28      | EK4  | Oye              | Oye         | 7.7979°N       | 5.3286°E  | <i>Auricularia</i> | <i>auricula</i> |
| 29      | EK5  | Irepodun         | Igede       | 7.7313°N       | 5.2476°E  | <i>Auricularia</i> | <i>auricula</i> |
| 30      | EK6  | Ikere            | Ikere       | 7.4991°N       | 5.2319°E  | <i>Auricularia</i> | <i>auricula</i> |
| 31      | EK7  | Ijero            | Ijero Ekiti | 7.8120°N       | 5.0677°E  | <i>Auricularia</i> | <i>auricula</i> |
| 32      | EK8  | Emure            | Emure Ekiti | 7.4317°N       | 5.4621°E  | <i>Auricularia</i> | <i>auricula</i> |

242 State Code: EK→Ekiti  → No *Auricularia* specimen found in that region

243 **Table 13:** Geo-mapping of *Auricularia* species in Ondo, Nigeria based on morphological characters

| Tag     |      | Location         |           | GPS Coordinate |           | Status             |                   |
|---------|------|------------------|-----------|----------------|-----------|--------------------|-------------------|
| Station | Code | Local Govt. Area | Town      | Latitude       | Longitude | Genus              | Species           |
| 33      | OD1  | Idanre           | Idanre    | 7.0914°N       | 5.1484°E  | <i>Auricularia</i> | <i>polytricha</i> |
| 34      | OD2  | Ilaje            | Igbokoda  | 6.2585°N       | 4.7692°E  | <i>Auricularia</i> | <i>polytricha</i> |
| 35      | OD3  | Ile Oluji        | Ile Oluji | 7.2825°N       | 4.8521°E  | <i>Auricularia</i> | <i>polytricha</i> |
| 36      | OD4  | Odigbo           | Ore       | 6.7519°N       | 4.8780°E  | <i>Auricularia</i> | <i>polytricha</i> |
| 37      | OD5  | Okitipupa        | Okitipupa | 6.5025°N       | 4.7795°E  | <i>Auricularia</i> | <i>polytricha</i> |
| 38      | OD6  | Ose              | Ifon      | 6.9235°N       | 5.7774°E  | <i>Auricularia</i> | <i>polytricha</i> |
| 39      | OD7  | Owo              | Owo       | 7.1989°N       | 5.5932°E  | <i>Auricularia</i> | <i>polytricha</i> |
| 40      | OD8  | Ifedore          | Igba Oke  | 7.3877°N       | 5.0807°E  | <i>Auricularia</i> | <i>polytricha</i> |
| 54      | OD9  | Akure South      | Akure     | 7.2571°N       | 5.2058°E  | None               | None              |

244 State Code: OD→Ondo  → No *Auricularia* specimen found in that region

245 **Table 14:** Geo-mapping of *Auricularia* species in Osun, Nigeria based on morphological characters

| Tag     |      | Location         |                 | GPS Coordinate |           | Status             |                 |
|---------|------|------------------|-----------------|----------------|-----------|--------------------|-----------------|
| Station | Code | Local Govt. Area | Town            | Latitude       | Longitude | Genus              | Species         |
| 41      | OS1  | Bolunduro        | Ota Aiyebaju    | 7.5912°N       | 4.7329°E  | <i>Auricularia</i> | <i>auricula</i> |
| 42      | OS2  | Ejigbo           | Ejigbo          | 7.9045°N       | 4.3052°E  | <i>Auricularia</i> | <i>auricula</i> |
| 43      | OS3  | Ifedayo          | Oke Ila Orangun | 7.9946°N       | 4.9974°E  | <i>Auricularia</i> | <i>auricula</i> |
| 44      | OS4  | Ifelodun         | Ikirun          | 7.9227°N       | 4.6347°E  | <i>Auricularia</i> | <i>auricula</i> |
| 45      | OS5  | Ila              | Ila Orangun     | 8.0121°N       | 4.8988°E  | <i>Auricularia</i> | <i>auricula</i> |
| 46      | OS6  | Irepodun         | Ilobu           | 7.9021°N       | 4.5315°E  | <i>Auricularia</i> | <i>auricula</i> |
| 47      | OS7  | Iwo              | Iwo             | 7.6292°N       | 4.1872°E  | <i>Auricularia</i> | <i>auricula</i> |
| 48      | OS8  | Obokun           | Ibokun          | 7.8019°N       | 4.7692°E  | <i>Auricularia</i> | <i>auricula</i> |
| 49      | OS9  | Irewole          | Ikire           | 7.3700°N       | 4.1872°E  | None               | None            |
| 50      | OS10 | Oriade           | Ilesha          | 7.6395°N       | 4.7588°E  | None               | None            |
| 51      | OS11 | Oriade           | Ipetu Ijesha    | 7.4273°N       | 4.9091°E  | None               | None            |

246 State Code: OS→Osun  → No *Auricularia* specimen found in that

## 247 **3.2 Molecular characterization of Prospective *Auricularia* sp.**

### 248 **3.2.1 DNA Purification (Quality) and Quantification**

249 The prospective *Auricularia* specimens marked out from forty eight (48) locations within  
250 Southwest, Nigeria were further subjected to molecular test in order to ascertain and fully establish  
251 the genomic differences that exist among the mushroom specimens based on the influence of the  
252 environment and geographical boundaries, and further enhance the characterization made in this  
253 research based on morphological markers (Table 9-14). The first step was to extract and sequence  
254 their DNA materials. The extracted DNA from each prospective *Auricularia* Mushroom was tested  
255 for impurities; the purity of the extracted DNA samples was determined by UV light Absorbance at  
256 260/280nm ratio using a spectrophotometer prior to PCR and RAPD analysis (See Table 15-20 for  
257 more details).

258 Majority of the DNA samples extracted for use in this experiment were pure ( $A_{260/280} \sim 1.8$ ) i.e.  
259 high-quality DNA extracts, with the exception of OG2 ( $A_{260/280} = 1.78$ ), OG6 ( $A_{260/280} = 1.76$ ) (Table  
260 15), EK2 ( $A_{260/280} = 1.74$ ), EK3 ( $A_{260/280} = 1.75$ ) (Table 18), OD2 ( $A_{260/280} = 1.67$ ), OD8 ( $A_{260/280} =$   
261 1.62) (Table 19), and OS4 ( $A_{260/280} = 1.75$ ) (Table 20), with little protein and RNA contaminants  
262 found in their DNA extracts. It was observed that *Auricularia* specimen collected from Station 8 in  
263 Ogun State had the highest quantity of pelleted DNA sample with 1,548.2ng/ $\mu$ L of pure  
264 concentrated nucleic acid (Table 15). The least quantity of DNA extracts was obtained from  
265 *Auricularia* mushroom samples within Station 6 in Ondo State (56.5ng/ $\mu$ L of Nucleic acid  
266 concentration) (Table 19).

267



268 **Table 15:** Qualitative assessment of nucleic acid extracted from *Auricularia* species in Ogun State

| Station | Code | Town      | Latitude | Longitude | Nucleic Acid Conc. (ng/μL) | A <sub>260/280</sub> |
|---------|------|-----------|----------|-----------|----------------------------|----------------------|
| 01      | OG1  | Abeokuta  | 7.1475°N | 3.3619°E  | 190.6                      | 2.03                 |
| 02      | OG2  | Itori     | 6.9530°N | 3.2181°E  | 79.70                      | 1.78                 |
| 03      | OG3  | Ifo       | 6.8192°N | 3.1930°E  | 250.0                      | 1.87                 |
| 04      | OG4  | Ijebu Ode | 6.8300°N | 3.9165°E  | 118.0                      | 1.95                 |
| 05      | OG5  | Ikenne    | 6.8717°N | 3.7105°E  | 107.9                      | 1.87                 |
| 06      | OG6  | Shagamu   | 6.8322°N | 3.6319°E  | 189.0                      | 1.76                 |
| 07      | OG7  | Odeda     | 7.2328°N | 3.5281°E  | 92.10                      | 2.02                 |
| 08      | OG8  | Odogbolu  | 6.8365°N | 3.7689°E  | 1548.2                     | 1.89                 |

269 State Code: OG→Ogun

270

271 **Table 16:** Qualitative description of nucleic acid extracted from *Auricularia* species in Lagos State

| Station | Code | Town    | Latitude | Longitude | Nucleic Acid Conc. (ng/μL) | A <sub>260/280</sub> |
|---------|------|---------|----------|-----------|----------------------------|----------------------|
| 09      | LA1  | Ikeja   | 6.6180°N | 3.3209°E  | 79.00                      | 2.08                 |
| 10      | LA2  | Ojo     | 6.4579°N | 3.1580°E  | 282.3                      | 2.14                 |
| 11      | LA3  | Ikeja   | 6.4553°N | 3.3641°E  | 309.1                      | 2.12                 |
| 12      | LA4  | Badagry | 6.4316°N | 2.8876°E  | 137.8                      | 2.13                 |
| 13      | LA5  | Epe     | 6.6055°N | 3.9470°E  | 890.0                      | 1.83                 |
| 14      | LA6  | Shomolu | 6.5392°N | 3.3842°E  | 96.90                      | 2.11                 |
| 15      | LA7  | Ikorodu | 6.6194°N | 3.5105°E  | 94.00                      | 2.11                 |
| 16      | LA8  | Ikeja   | 6.5273°N | 3.3414°E  | 187.7                      | 2.03                 |

272 State Code: LA→Lagos

273

274 **Table 17:** Qualitative description of nucleic acid extracted from *Auricularia* species in Oyo State

| Station | Code | Town       | Latitude | Longitude | Nucleic Acid Conc. (ng/μL) | A <sub>260/280</sub> |
|---------|------|------------|----------|-----------|----------------------------|----------------------|
| 17      | OY1  | Moniya     | 7.5249°N | 3.9152°E  | 110.6                      | 2.06                 |
| 18      | OY2  | Egbeda     | 7.3796°N | 3.9675°E  | 1507.5                     | 1.92                 |
| 19      | OY3  | Ido        | 7.5077°N | 3.7194°E  | 96.70                      | 2.07                 |
| 20      | OY4  | Iseyin     | 7.9765°N | 3.5914°E  | 1118                       | 1.96                 |
| 21      | OY5  | Ogbomosho  | 8.1227°N | 4.2436°E  | 543.5                      | 1.99                 |
| 22      | OY6  | Idi Ayunre | 7.2247°N | 3.8732°E  | 193.8                      | 2.10                 |
| 23      | OY7  | Oyo        | 7.8430°N | 3.9368°E  | 490.7                      | 2.01                 |
| 24      | OY8  | Igbeti     | 8.7699°N | 4.1104°E  | 239.3                      | 2.10                 |

275 State Code: OY→Oyo

276

277

278

279 **Table 18:** Qualitative description of nucleic acid extracted from *Auricularia* species in Ekiti State

| Station | Code | Town        | Latitude | Longitude | Nucleic Acid Conc. (ng/μL) | A <sub>260/280</sub> |
|---------|------|-------------|----------|-----------|----------------------------|----------------------|
| 25      | EK1  | Ado Ekiti   | 7.6124°N | 5.2371°E  | 867.5                      | 2.04                 |
| 26      | EK2  | Iye         | 7.9591°N | 5.2371°E  | 87.30                      | 1.74                 |
| 27      | EK3  | Ikole       | 7.7983°N | 5.5145°E  | 80.80                      | 1.75                 |
| 28      | EK4  | Oye         | 7.7979°N | 5.3286°E  | 120.3                      | 1.95                 |
| 29      | EK5  | Igede       | 7.7313°N | 5.2476°E  | 100.6                      | 2.11                 |
| 30      | EK6  | Ikere       | 7.4991°N | 5.2319°E  | 450.2                      | 1.99                 |
| 31      | EK7  | Ijero Ekiti | 7.8120°N | 5.0677°E  | 125.0                      | 2.09                 |
| 32      | EK8  | Emure Ekiti | 7.4317°N | 5.4621°E  | 138.0                      | 2.39                 |

280 State Code: EK→Ekiti

281

282 **Table 19:** Qualitative description of nucleic acid extracted from *Auricularia* species in Ondo State

| Station | Code | Town       | Latitude | Longitude | Nucleic Acid Conc. (ng/μL) | A <sub>260/280</sub> |
|---------|------|------------|----------|-----------|----------------------------|----------------------|
| 33      | OD1  | Idanre     | 7.0914°N | 5.1484°E  | 190.6                      | 2.03                 |
| 34      | OD2  | Igbokoda   | 6.2585°N | 4.7692°E  | 107.9                      | 1.67                 |
| 35      | OD3  | Ile Oluji  | 7.2825°N | 4.8521°E  | 92.10                      | 2.02                 |
| 36      | OD4  | Ore        | 6.7519°N | 4.8780°E  | 105.0                      | 2.08                 |
| 37      | OD5  | Okitipupa  | 6.5025°N | 4.7795°E  | 309.1                      | 2.12                 |
| 38      | OD6  | Ifon       | 6.9235°N | 5.7774°E  | 56.50                      | 1.83                 |
| 39      | OD7  | Owo        | 7.1989°N | 5.5932°E  | 94.00                      | 2.11                 |
| 40      | OD8  | Igbara Oke | 7.3877°N | 5.0807°E  | 1507.5                     | 1.62                 |

283 State Code: OD→Ondo

284

285 **Table 20:** Qualitative description of nucleic acid extracted from *Auricularia* species in Osun State

| Station | Code | Town            | Latitude | Longitude | Nucleic Acid Conc. (ng/μL) | A <sub>260/280</sub> |
|---------|------|-----------------|----------|-----------|----------------------------|----------------------|
| 41      | OS1  | Ota Aiyebaju    | 7.5912°N | 4.7329°E  | 543.5                      | 1.99                 |
| 42      | OS2  | Ejigbo          | 7.9045°N | 4.3052°E  | 490.7                      | 2.01                 |
| 43      | OS3  | Oke Ila Orangun | 7.9946°N | 4.9974°E  | 867.5                      | 2.04                 |
| 44      | OS4  | Ikirun          | 7.9227°N | 4.6347°E  | 87.30                      | 1.75                 |
| 45      | OS5  | Ila Orangun     | 8.0121°N | 4.8988°E  | 80.80                      | 1.85                 |
| 46      | OS6  | Ilobu           | 7.9021°N | 4.5315°E  | 120.3                      | 1.95                 |
| 47      | OS7  | Iwo             | 7.6292°N | 4.1872°E  | 100.6                      | 2.11                 |
| 48      | OS8  | Ibokun          | 7.8019°N | 4.7692°E  | 193.8                      | 2.10                 |

286 State Code: OD→Ondo

287

288

289

### 290 **3.2.2 Genetic diversity (speciation) of the sequenced *Auricularia* sp.**

291 The major allele frequency, number of alleles, genetic diversity and polymorphic information  
 292 content (PIC) of the sequenced DNA extracts from all the *Auricularia* mushroom specimens geo-  
 293 tagged within Southwest, Nigeria was presented in Table 21. The allele frequency ranged from  
 294 0.3542 (OPB-15) to 0.6042 (OPH-15), while the genetic diversity was from 0.5930 (OPH-15) to  
 295 0.7977 (OPB-12) and the polymorphic information content was from 0.5594 (OPH-15) to 0.7819  
 296 (OPB-12). The percentage polymorphic amplicons varied from 55.9 (OPH-15) - 78.2% (OPB-12).  
 297 Therefore, OPB-12 RAPD primer gave the highest level of polymorphism (78.2%) while OPH-15  
 298 gave the least level of polymorphism (55.9%) as represented in Table 21. Nevertheless, the  
 299 polymorphisms revealed by the 14 decamer primers indicate that they are good and reliable for  
 300 genetic diversity assessment in Mushroom and there is a high degree of diversity in the species  
 301 studied.

302 **Table 21:** Genetic diversity of the sequenced *Auricularia* specimens from Southwest, Nigeria

| DNA Primers | Major Allele Freq. | No. of Allele | Genetic diversity | PIC  | Polymorphic Amplicons (%) |
|-------------|--------------------|---------------|-------------------|------|---------------------------|
| OPB-11      | 0.44               | 14.0          | 0.78              | 0.76 | 76.2                      |
| OPB-12      | 0.40               | 13.0          | 0.80              | 0.78 | 78.2                      |
| OPB-15      | 0.35               | 11.0          | 0.79              | 0.76 | 76.4                      |
| OPB-20      | 0.44               | 14.0          | 0.78              | 0.76 | 76.3                      |
| OPB-21      | 0.54               | 16.0          | 0.69              | 0.68 | 67.9                      |
| OPH-03      | 0.46               | 12.0          | 0.75              | 0.74 | 73.6                      |
| OPH-05      | 0.56               | 6.0           | 0.63              | 0.60 | 60.1                      |
| OPH-10      | 0.44               | 5.0           | 0.72              | 0.68 | 67.9                      |
| OPH-15      | 0.60               | 5.0           | 0.59              | 0.56 | 55.9                      |
| OPT-01      | 0.46               | 11.0          | 0.74              | 0.71 | 71.3                      |
| OPT-05      | 0.54               | 8.0           | 0.65              | 0.62 | 62.0                      |
| OPT-07      | 0.46               | 7.0           | 0.72              | 0.69 | 68.7                      |
| OPT-10      | 0.46               | 16.0          | 0.76              | 0.75 | 75.4                      |
| OPT-19      | 0.52               | 14.0          | 0.70              | 0.69 | 68.7                      |
| Average     | 0.48               | 10.9          | 0.72              | 0.70 | 70.0                      |

303 Sample size (n = 48)

### 304 **3.2.3 DNA fingerprinting and nucleotide polymorphism**

305 The DNA marker OPB-21 had the highest number of polymorphic nucleotide (45/48) formed at  
306 900bp (Fig 6 and Table 22), while DNA markers OPB-11 and OPB-15 at a joint highest record of  
307 polymorphic nucleotide units (46/48 each) at 100bp (Table 22). Majority of the *Auricularia* samples  
308 profiled on electrophoresis gel had no polymorphic nucleotides formed between 800-900bp units for  
309 the DNA markers OPB-11 (Fig 2), OPB-12 (Fig 3), OPB-15 (Fig 4), OPH-3, OPH-5 (Table 22),  
310 OPH-10 (Fig 7), OPH-15, OPT-1, OPT-5, OPT-7, OPT-10 (Table 22), and OPT-19 (Fig 8). A  
311 breakdown of the electrophoresis gel analysis for all base pair units was as follows: OPT-5 marker  
312 had 44/48 polymorphic nucleotides at 200bp, OPH-5 had 36/48 at 300bp, OPT-19 had 41/48 at  
313 400bp, OPT-1 had 44/48 at 500bp, OPT-10 had 41/48 at 600bp, OPB-20 had 43/48 at 700bp and  
314 46/48 at 800bp respectively as shown in Table 22 (only the highest number of polymorphic  
315 nucleotide was captioned).

316 Also, it was noted that OPH-5 DNA marker expressed polymorphism in 3 bands only (100, 200 and  
317 300bp, respectively) making it the least effective marker for this experiment, OPH-10, OPH-15 and  
318 OPT-5 all expressed nucleotide polymorphism in 4 bands each (100, 200, 300 and 400bp,  
319 respectively), whereas, OPH-3 and OPT-7 showed nucleotide polymorphism at 100, 200, 300, 400  
320 and 500bp, respectively (i.e. 5 bands each). Furthermore, OPB-15, OPT-1 and OPT-19 expressed  
321 polymorphism in 6 band units each (100, 200, 300, 400, 500 and 600bp, respectively), OPB-11,  
322 OPB-12 and OPT-10 each expressed nucleotide polymorphism in 7 bands (100, 200, 300, 400, 500,  
323 600 and 700bp, respectively), and OPB-20 (shown in Fig 5) had 8 band units of polymorphic  
324 nucleotides (100, 200, 300, 400, 500, 600, 700 and 800, respectively). Finally, the highest band  
325 expression for polymorphic nucleotides was found in the DNA marker OPB-21 with 9 band units

326 (100, 200, 300, 400, 500, 600, 700, 800 and 900bp, respectively) thus, making it the most efficient  
 327 marker for determining genetic variation with the earmarked *Auricularia* species in Southwest,  
 328 Nigeria (Table 22).

329 **Table 22:** The number of polymorphic nucleotide amplified by different RAPD markers

| Markers | Polymorphic Nucleotide Count/bp Units |       |       |       |       |       |       |       |       |
|---------|---------------------------------------|-------|-------|-------|-------|-------|-------|-------|-------|
|         | 900bp                                 | 800bp | 700bp | 600bp | 500bp | 400bp | 300bp | 200bp | 100bp |
| OPB-11  | 00                                    | 00    | 06    | 13    | 13    | 06    | 33    | 38    | 46    |
| OPB-12  | 00                                    | 00    | 22    | 02    | 31    | 37    | 24    | 32    | 32    |
| OPB-15  | 00                                    | 00    | 00    | 32    | 26    | 21    | 10    | 42    | 46    |
| OPB-20  | 00                                    | 46    | 43    | 02    | 35    | 16    | 02    | 32    | 44    |
| OPB-21  | 45                                    | 09    | 12    | 37    | 17    | 09    | 01    | 09    | 39    |
| OPH-3   | 00                                    | 00    | 00    | 00    | 36    | 27    | 14    | 27    | 40    |
| OPH-5   | 00                                    | 00    | 00    | 00    | 00    | 00    | 36    | 35    | 04    |
| OPH-10  | 00                                    | 00    | 00    | 00    | 00    | 03    | 21    | 31    | 07    |
| OPH-15  | 00                                    | 00    | 00    | 00    | 00    | 03    | 04    | 07    | 05    |
| OPT-1   | 00                                    | 00    | 00    | 09    | 44    | 28    | 09    | 38    | 33    |
| OPT-5   | 00                                    | 00    | 00    | 00    | 00    | 02    | 10    | 44    | 17    |
| OPT-7   | 00                                    | 00    | 00    | 00    | 02    | 02    | 04    | 26    | 31    |
| OPT-10  | 00                                    | 00    | 38    | 41    | 15    | 12    | 05    | 04    | 26    |
| OPT-19  | 00                                    | 00    | 00    | 30    | 38    | 41    | 16    | 12    | 05    |

330

331

332 **Fig 2. RAPD profiling of 24 *Auricularia* mushroom specimens using OPB-11 marker**

333 **Fig 3. RAPD profiling of 24 *Auricularia* mushroom specimens using OPB-12 marker**

334 **Fig 4. RAPD profiling of 20 *Auricularia* mushroom specimens using OPB-15 marker**

335 **Fig 5. RAPD profiling of 20 *Auricularia* mushroom specimens using OPB-20 marker**

336 **Fig 6. RAPD profiling of 10 *Auricularia* mushroom specimens using OPB-21 marker**

337 **Fig 7. RAPD profiling of 24 *Auricularia* mushroom specimens using OPH-10 marker**

338 **Fig 8. RAPD profiling of 24 *Auricularia* mushroom specimens using OPT-19 marker**

339

340

### 341 **3.2.4 The Level of polymorphism within the *Auricularia* sp.**

342 It was observed from the records in Table 23 that the DNA markers OPB-11, OPB-15, OPB-20,  
 343 OPB-21, OPT-1 and OPT-5 was able to effectively detect 90-99% polymorphism in the DNA  
 344 strands of the *Auricularia* specimen profiled on electrophoresis gel (Table 23), as such they were  
 345 listed as the best markers for this research. Other DNA markers such as OPH-3, OPT-10 and OPT-  
 346 19 showed an impressive 80-89% variability within the *Auricularia* population in Southwest,  
 347 Nigeria, while OPB-12 and OPH-5 were able to give between 70-79% variation in the examined  
 348 *Auricularia* mushroom population. DNA markers OPH-10 and OPT-7 each gave between 60-69%  
 349 variation, while OPH-15 was only able to detect between 10-19% variation at maximum in the  
 350 *Auricularia* mushroom population of Southwest, Nigeria (Table 23).

351 **Table 23:** The percentage variation (polymorphism) that exist among the selected *Auricularia* spp

| Marker | DNA Polymorphism (%) |       |       |       |       |       |       |       |       |
|--------|----------------------|-------|-------|-------|-------|-------|-------|-------|-------|
|        | 900bp                | 800bp | 700bp | 600bp | 500bp | 400bp | 300bp | 200bp | 100bp |
| OPB-11 | 0.0                  | 0.0   | 12.5  | 27.1  | 27.1  | 12.5  | 68.8  | 79.2  | 95.8  |
| OPB-12 | 0.0                  | 0.0   | 45.8  | 4.2   | 64.6  | 77.1  | 50.0  | 66.7  | 66.7  |
| OPB-15 | 0.0                  | 0.0   | 0.0   | 66.7  | 54.2  | 43.8  | 20.8  | 87.5  | 95.8  |
| OPB-20 | 0.0                  | 95.8  | 89.6  | 4.2   | 72.9  | 33.3  | 4.2   | 66.7  | 91.7  |
| OPB-21 | 93.8                 | 18.8  | 25.0  | 77.1  | 35.4  | 18.8  | 2.1   | 18.8  | 81.3  |
| OPH-3  | 0.0                  | 0.0   | 0.0   | 0.0   | 75.0  | 56.3  | 29.2  | 56.3  | 83.3  |
| OPH-5  | 0.0                  | 0.0   | 0.0   | 0.0   | 0.0   | 0.0   | 75.0  | 72.9  | 8.3   |
| OPH-10 | 0.0                  | 0.0   | 0.0   | 0.0   | 0.0   | 6.3   | 43.8  | 64.6  | 14.6  |
| OPH-15 | 0.0                  | 0.0   | 0.0   | 0.0   | 0.0   | 6.3   | 8.3   | 14.6  | 10.4  |
| OPT-1  | 0.0                  | 0.0   | 0.0   | 18.8  | 91.7  | 58.3  | 18.8  | 79.2  | 68.8  |
| OPT-5  | 0.0                  | 0.0   | 0.0   | 0.0   | 0.0   | 4.2   | 20.8  | 91.7  | 35.4  |
| OPT-7  | 0.0                  | 0.0   | 0.0   | 0.0   | 4.2   | 4.2   | 8.3   | 54.2  | 64.6  |
| OPT-10 | 0.0                  | 0.0   | 79.2  | 85.4  | 31.3  | 25.0  | 10.4  | 8.3   | 54.2  |
| OPT-19 | 0.0                  | 0.0   | 0.0   | 62.5  | 79.2  | 85.4  | 33.3  | 25.0  | 10.4  |

352

353

354

355

### 356 **3.2.5 Grouping of *Auricularia* sp. in Nigeria based on genotype**

357 The population of all the *Auricularia* mushrooms currently present in the six (6) States of  
358 Southwest, Nigeria were effectively classified into six (6) clusters on the genetic dissimilarity chart  
359 (Fig 9) using PCR and RAPD markers on representative samples collected during field survey. The  
360 six (6) clusters of mushroom categories were effectively characterized into three (3) distinct species  
361 and further sub-classified into five (5) cultivars (sub-species). The genetic relatedness of all the  
362 *Auricularia* mushrooms' population in Southwest, Nigeria was represented in Fig 9 and as such,  
363 classified thus:

#### 364 **Species 1: *Auricularia polytricha***

365 → Cultivar I (Group I): OD1, OD8, OY1, OG1, OG2, LA6, LA7, LA8

366 → Cultivar II (Group II): OD2, OD3, OD4, OD5, OD6, OD7

367 → Cultivar III (Group IV): LA5

#### 368 **Species 2: *Auricularia auricula***

369 → Cultivar I (Group III): OG3, OG4, OG5, OG6, OG7, OG8, OS1, OS2, OS3, OS4,  
370 OS5, OS6, OS7, OS8, EK1, EK2, EK3, EK4, EK5, EK6, EK7, EK8

371 → Cultivar II (Group V): OY2, LA1, LA2, LA3, LA4, OY5, OY6, OY7, OY8

#### 372 **Species 3: Unrelated *Auricularia* specimen (Outliers)**

373 OY3, OY4

374 **Note:** *The farther apart the *Auricularia* mushrooms on the genetic dissimilarity tree, the more*  
375 *related the species.*

376  
377  
378

379 **Fig 9. Genetic dissimilarity among the population of *Auricularia* spp in Southwestern Nigeria**

## 380 **4.0 Discussion**

381 The morphological markers used in this study was able to identify thirty one (31) locations in  
382 Southwest, Nigeria where *Auricularia auricula* can be found, and twelve (12) locations where  
383 *Auricularia polytricha* thrived better within the region under survey. It was noted also that six (6)  
384 out of the earmarked fifty four (54) locations had no *Auricularia* mushrooms present within their  
385 domain. These could be as a result of severe foraging (wild mushroom exploit) or destruction of  
386 their natural habitats by man. Samples of *Auricularia auricula* was evenly distributed in Ekiti,  
387 Osun, Ogun, Oyo and Lagos States; but there was none identified in Ondo State as at the time of  
388 filing this reports. There are limited scientific explanations to this observation since the region  
389 enjoys a seemingly even distribution of rainfall and sunshine as do other States in Southwestern  
390 Nigeria. *Auricularia polytricha* was found in abundance in Ondo and Lagos States only, but none  
391 was found in Ogun, Ekiti, Osun and Oyo States. Ironically, a scientific explanation is imminent.  
392 Therefore, more research work is recommended in this field and with regards to the observations  
393 outlined by this research in order to fully address the questions raised. The findings were in line  
394 with the reports of Onyango *et al.*, 2010) who identified three (3) main strains (brown, dark brown  
395 and yellow brown) of *Auricularia* mushrooms occurring in the forest region of Africa using  
396 morphological markers. Also, Li *et al.* (2011) reported that similar clustered patterns, reveals that all  
397 the tested strains could be divided into three distinct groups, each of which was correlated with  
398 different geographical regions.

399 In order to ascertain and fully establish the genomic differences that exist among the mushroom  
400 specimens based on the influence of the environment and geographical boundaries, and further  
401 enhance the characterization made in this research based on morphological markers. The



402 mushrooms were further subjected to molecular testing using PCR and RAPD techniques.  
403 Molecular markers such as rDNA sequencing, Restriction fragment length polymorphism (RFLP),  
404 Random amplified polymorphic DNA (RAPD) and genotyping have been used to discriminate  
405 mushroom species or strains of *Agaricus*, *Auricularia*, *Ganoderma*, *Lentinula*, *Stropharia*, and  
406 *Volvariella*. All of these technologies provided data for mushroom strain identification and  
407 protection (Chandra *et al.*, 2010).

408 The DNA marker “OPH-5” was the least effective marker for this experiment, while OPB-21 was  
409 the most efficient marker for determining genetic variation with the earmarked *Auricularia* species  
410 in Southwest, Nigeria. This was in agreement with the research of Khan *et al.*, (2011) who  
411 conducted molecular characterization of Oyster mushroom (*Pleurotus* spp.) using 14 RAPD primers  
412 and obtained the highest polymorphism by primers OPL-3 (72.70 %) and OPL-11 (70%). Two  
413 species (P-56 and P-17) were found to be genetically similar having a similarity value of 86%. The  
414 population of all the *Auricularia* mushrooms currently present in the six (6) States of Southwest,  
415 Nigeria were effectively classified into six (6) clusters on the genetic dissimilarity chart using PCR  
416 and RAPD markers on representative samples collected during field survey. The six (6) clusters of  
417 mushroom categories were effectively characterized into three (3) distinct species and further sub-  
418 classified into five (5) cultivars (sub-species). The result obtained in this study also agrees with the  
419 report of Ravash *et al.*, (2009) who used RAPD markers to confirm the similarity or dissimilarity of  
420 genetic relationship of *Pleurotus* spp.

421

422

## 423 **Conclusion**

424 The use of morphological markers only for characterization of *Auricularia* species found in  
425 Southwest, Nigeria was pragmatic as it produced a very good result but the best option was a  
426 combination of both morphological and molecular markers (PCR and RAPD) to determine the  
427 genetic diversity and variation within the large genomic entity of *Auricularia* mushroom population  
428 in Southwest, Nigeria.

## 429 **Ethical Statement**

430 This is to confirm that:

431 Prof. Clementina O. Adenipekun, Dr. V. S. Ekun, Dr. P. M. Etaware and Dr. Omena B. Ojuederie  
432 declares that they have no conflict of interest and that they actively participated in the research both  
433 in the field and in the procurement of materials for morphological and molecular analysis.

434 Thank you

435 Peter M. Etaware (Ph.D.)

## 436 **Funding**

437 This research did not receive any specific grant from funding agencies in the public, commercial, or  
438 not for profit sectors.

## 439 **Conflict of Interest**

440 All the authors declare that there is no competing interest.

441

## 442 **Ethical Approval**

443 'Not applicable'.

## 444 **Consent to Participate**

445 All the authors gave their consent to participate in this research.

## 446 **Consent for Publication**

447 All the authors unanimously agreed that this article should be published

## 448 **Availability of Data and Material**

449 All data and material are present in this publication.

## 450 **Authors' Contributions**

451 E.V.S. and A.C.O conceptualized and designed the experiment. E.V.S conducted the research and E.  
452 P. M. wrote the draft manuscript. E. P. M. and O.O.B. reviewed the manuscript. All authors  
453 approved the final version of the manuscript.

## 454 **Reference**

455 Adenipekun, C .O., Ipeaiyeda, A. R., Olayonwa, A. J. and Egbewale, S. O. 2015. Biodegradation of  
456 Polycyclic Aromatic hydrocarbons (PAHS) in spent and fresh cuttings fluids contaminated  
457 soils by *Pleurotus pulmonarius* (Fries).Quelet and *Pleurotus ostreatus* (Jacq) Fr.Kumm.  
458 *African Journal of Biotechnology*. 14(8): 661-667

459 Al-Gabbiesh, A. H., Hassawi, D. S. and Afifi, F. U. 2006. Determination of genetic diversity among  
460 Iris species using Random Amplified Polymorphic DNA analysis. *Biotechnology*. 5(2): 173-  
461 179

- 462 Bandara, A. R., Rapior, S., Mortimer, P. E., Kakumyan, P., Hyde, K. O. and Xu, J. 2019. A review  
463 of the polysaccharide, protein and selected nutrient content of Auricularia, and their potential  
464 pharmacological value. *Mycosphere*. 10(1): 579-607
- 465 Chandra, S., Ghosh, K. and Acharya, K. 2010. Comparative studies on the Indian cultivated  
466 *Pleurotus* species by RAPD fingerprinting. *Nature and Science*. 8(7): 90-94
- 467 Chang, S. T. and Miles P. G. 2004. Mushrooms: Cultivation, Nutritional Value, Medicinal Effect  
468 and Environmental Impact. CRC Press, Inc. Florida. p. 451
- 469 Chang, S. T. and Hayes, W. A. 2013. The biology and cultivation of edible mushrooms. Academic  
470 Press, London, UK. 5pp.
- 471 Chen, H., Rangasamy, M., Tan, S. Y., Wang, H. and Siegfried, B. D. 2010. Evaluation of five  
472 methods of total DNA extraction from western corn rootworm beetles. *Plos ONE*: e11963.  
473 Doi:10.1371/journal.pone.0011963
- 474 Conte, A. D. and Læssøe, T. P.Y. 2008. The Edible Mushroom Book. *A gourmet's guide*. 68pp
- 475 Crous, P. W. I. H., Rong, A., Wood, S., Lee, H., Glen, W. *et al.* 2006. How many species of fungi  
476 are there at the tip of Africa?. *Studies in Mycology*, 55(1): 13-33
- 477 Etaware P. M., Adedeji A. R., Osowole O. I., and Odebode A. C. 2020. ETAPOD: A forecast model  
478 for prediction of black pod disease Outbreak in Nigeria. *Plos ONE*. 15(1):e0209306.  
479 <https://doi.org/10.1371/journal.pone.0209306>
- 480 Gateri, M. W., Muriuki, A. W., Waiganjo, M. W. and Ngeli, P. 2004. Cultivation and  
481 commercialization of edible mushrooms in Kenya: *A review of prospects and challenges of*  
482 *smallholder production*. 7pp
- 483 Guissou, K. M. L, Lykke , A. M., Sankara, P. and Guin- ko, S. 2008. Declining wild mushroom  
484 recognition and usage in Burkina Faso. *Economic Botany*. 62(3): 530-539
- 485 Hawksworth, D. L. 2004. Limitation of dual nomenclature for pleomorphic fungi. *Taxon*. 53: 596-  
486 598

- 487 Khan, S. M., Nawaz, A., Malik, W., Javed, N., Yasmin, T., Rehman, M., Qayyum, A., Iqbal, Q.,  
488 Ahmad, T. and Khan, A. A. 2011. Morphological and molecular characterization of Oyster  
489 mushroom (*Pleurotus* spp). *African Journal of Biotechnology*. 10(14): 2638-2643
- 490 Li, W. L., Yin-B., B. and Yang, X. 2011. Development of species-specific primers for identifying  
491 *Auricularia auricula-judae* using intergenic spacer 1 (IGS1) sequences. *African Journal of*  
492 *Biotechnology*. 10(69): 15494-15500
- 493 Moore, M. 2013. Mushrooms: taste of the earth. *Food and Nutrition*. 5pp
- 494 Musngi, R. B., Lalap, A. L. and Reyes, R. G. 2004. Four species of wild *Auricularia* in Central  
495 Africa. *Journal of Tropical Biology*. 3: 49-51
- 496 Onyango, B., Arama, P., Palapala, V., Wagai, S. and Gichimu, B. M. 2010. Suitability of selected  
497 supplemented substrates for cultivation of Kenyan native wood ear mushrooms (*Auricularia*  
498 *auricula*). *American Journal of Food and Technology*. 10: 1-9
- 499 Onyango, B. O., Palapala, V. A., Arama, P. F., Wagai, S. O. and Gichimu, B. M. 2011. Suitability  
500 of selected supplemented substrates for cultivation of Kenyan native wood earmushrooms  
501 (*Auricularia auricula*). *American Journal of Food Technology*. 6: 395-403
- 502 Osemwegie, O. O, Okhuoya, A. J. and Dania, A. T. 2014. Ethnomycological Conspectus of West  
503 African Mushrooms: An Awareness Document. *Advances in Microbiology*. 4: 39-54
- 504 Osemwegie, O. O. and Okhuoya J. A, 2009. Diversity of Macrofungi in Oil Palm Agro-forests of  
505 Edo State, Nigeria. *Journal of Biological Sciences*. 9: 584-593
- 506 Pei-Sheng, Y. and Chang, X. 2004. RAPD molecular differentiation of the cultivated strains of the  
507 mushrooms *Auricularia auricula* and *A. polytricha*. *IMIST-CNRS*. 73-92
- 508 Ravash, R., Shiran, B., Alavi, A. and Zarvadis, J. 2009. Evaluation of genetic diversity in Oyster  
509 mushroom (*Pleurotus eryngii*) isolates using RAPD marker. *J. Sci. and Technol. Agric. and*  
510 *Natur. Resour*. 13: 739-741
- 511 Royse, D. J., Baars, J. and Tan, Q. 2017. Current overview of mushroom production in the world.  
512 **In:** Zied, D. C., Pardo-Gimenez, A. (eds). *Edible and Medicinal mushrooms: technology and*  
513 *applications*. Wiley, Hoboken. <https://doi.org/10.1002/9781119149446.ch2>. pp 5-13

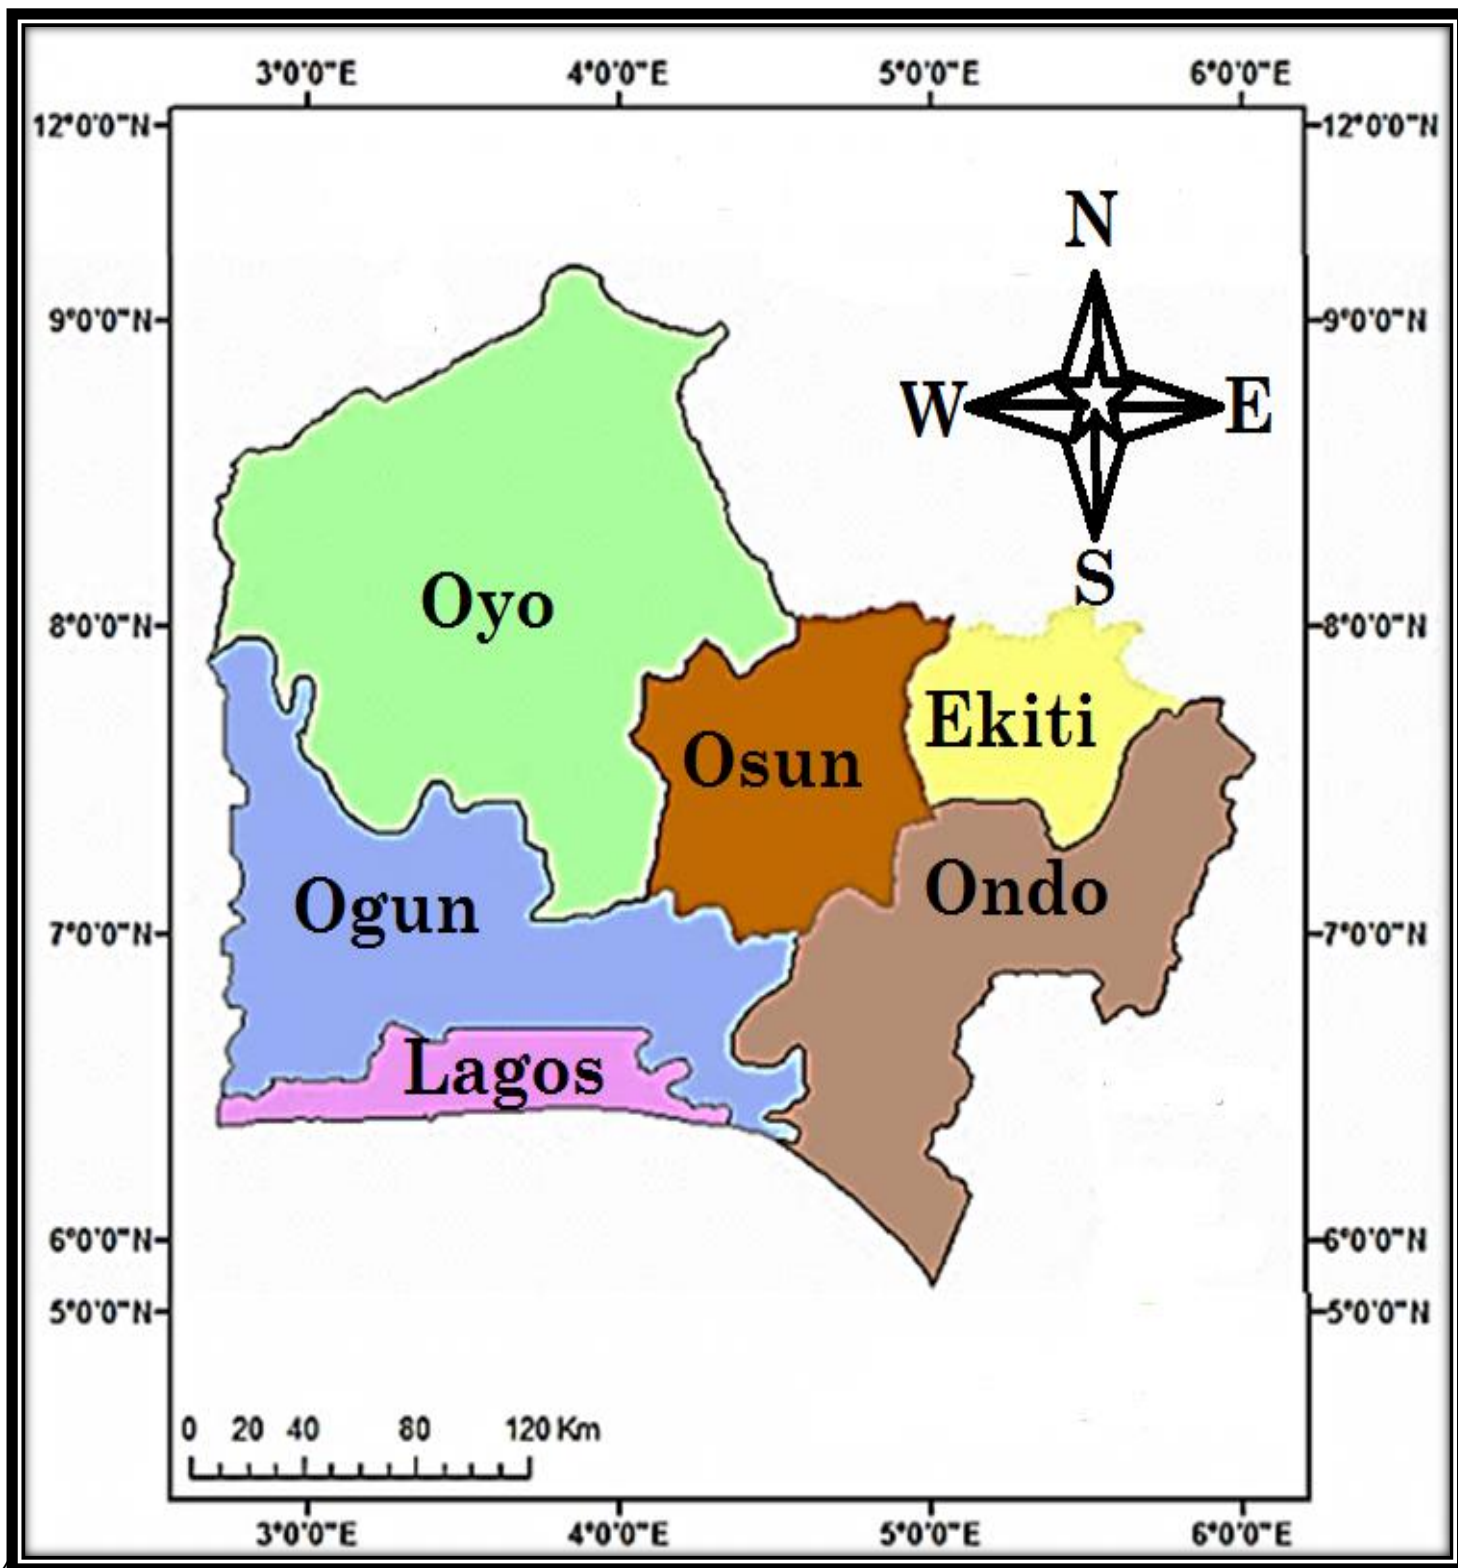

514

515 Fig 1

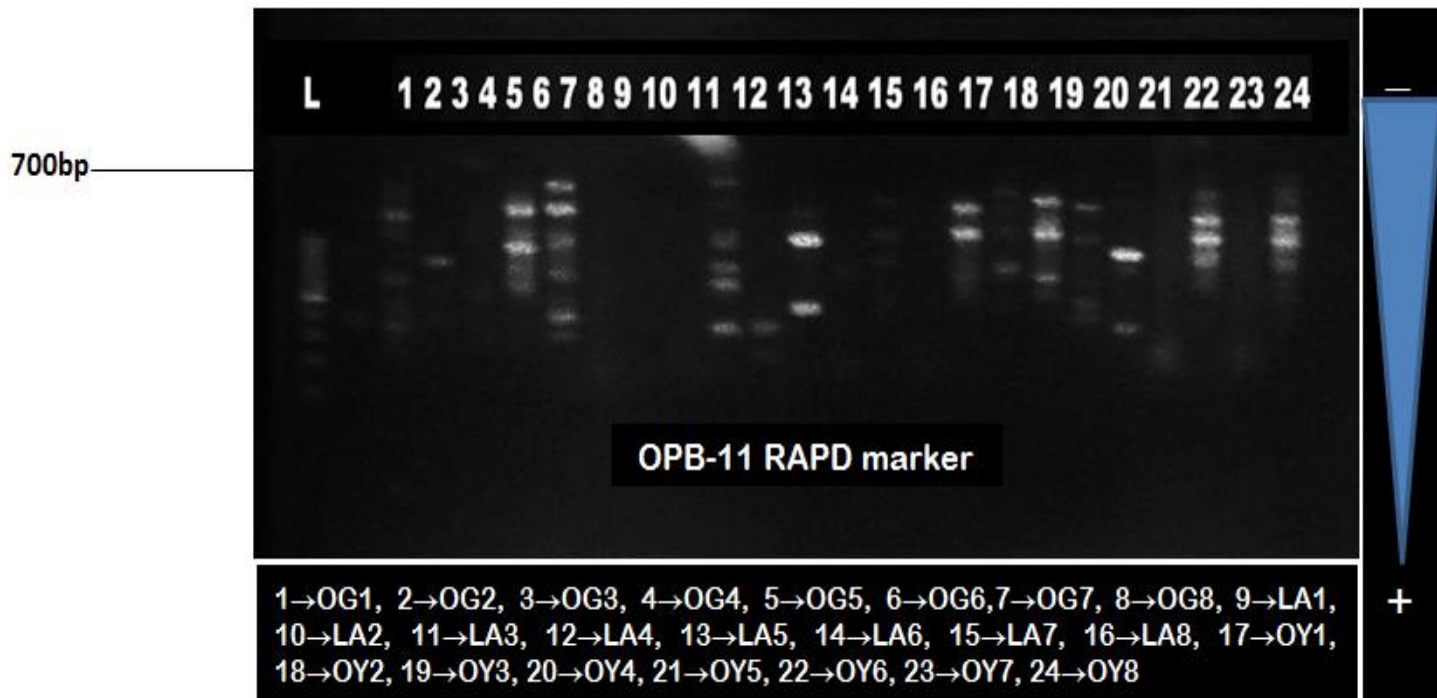

517 **Fig 2**

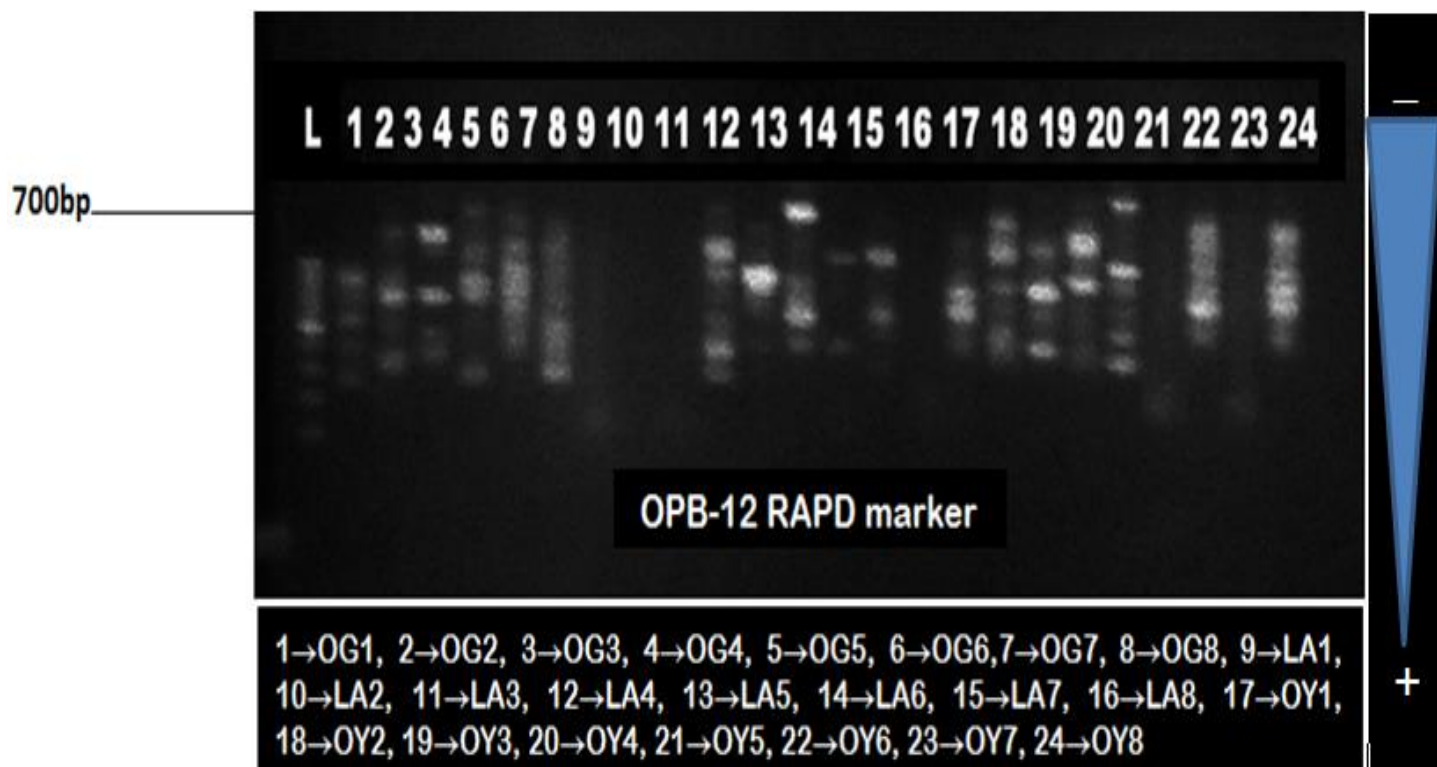

519 **Fig 3**

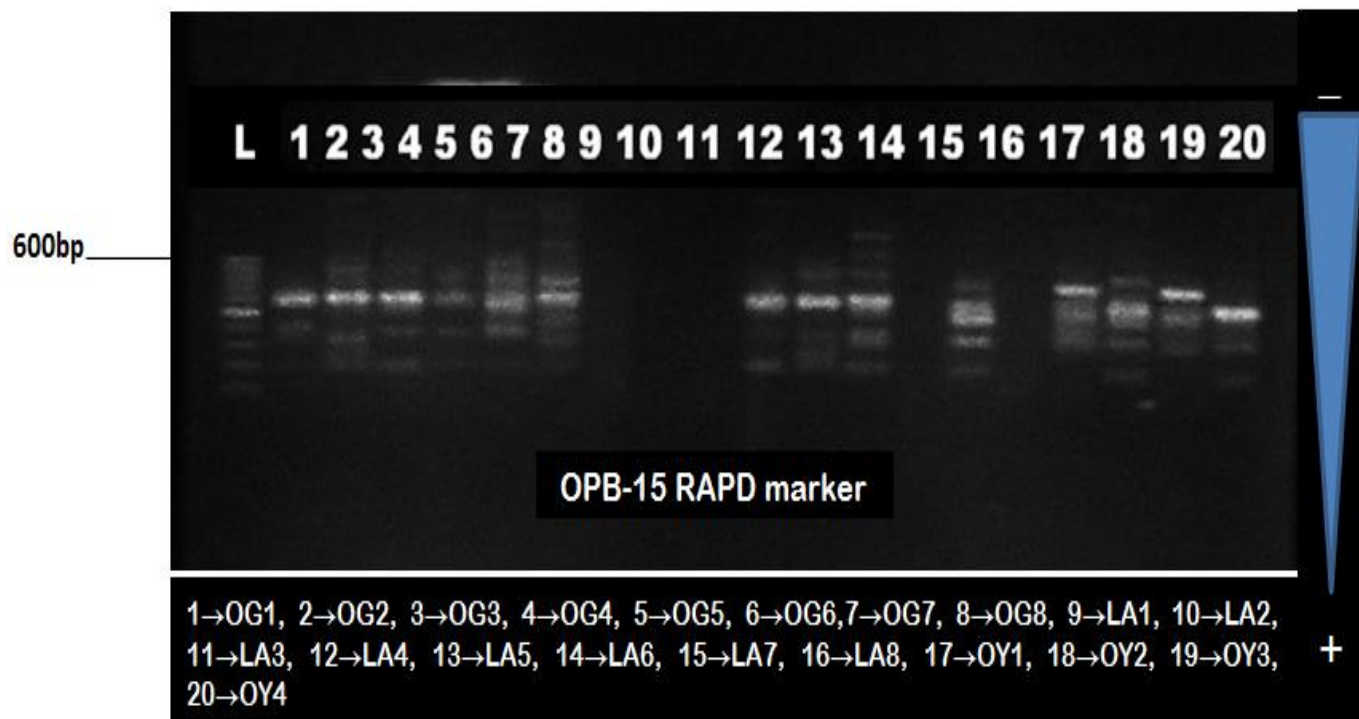

520

521 **Fig 4**

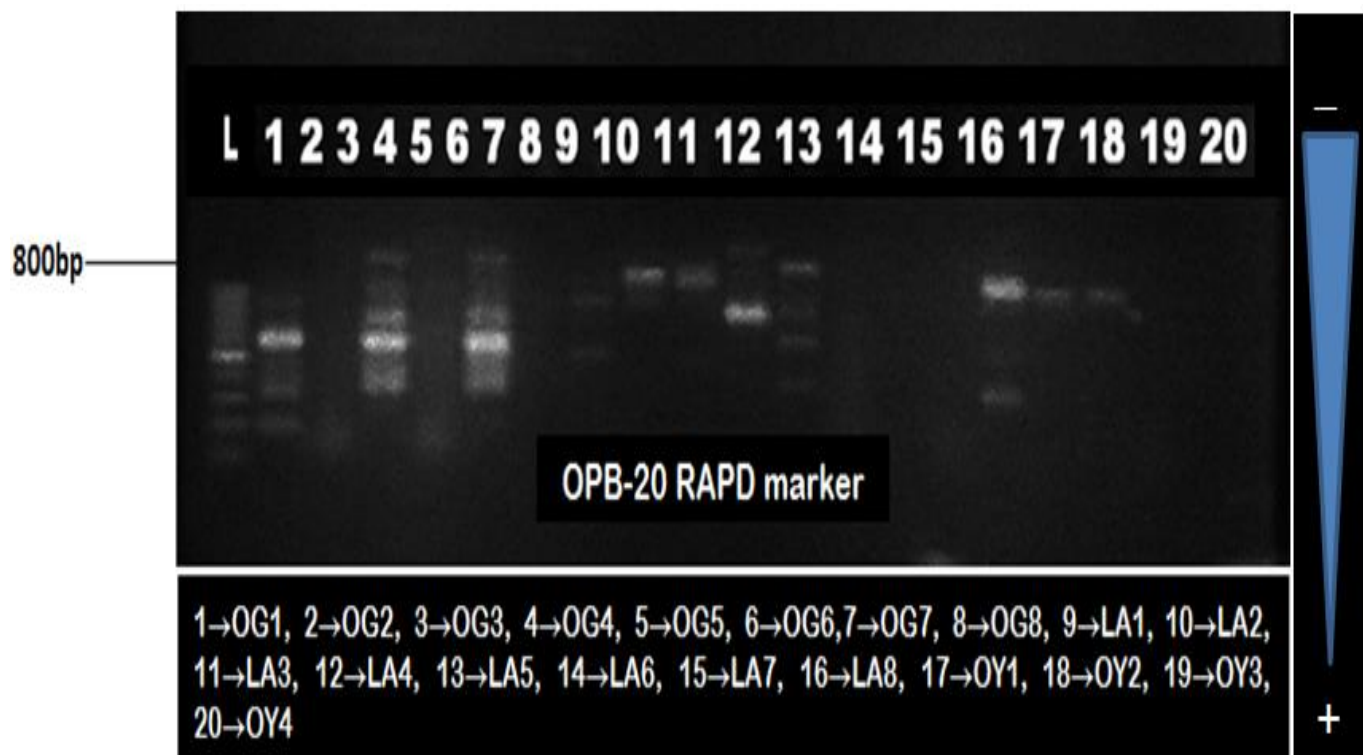

522

523 **Fig 5**



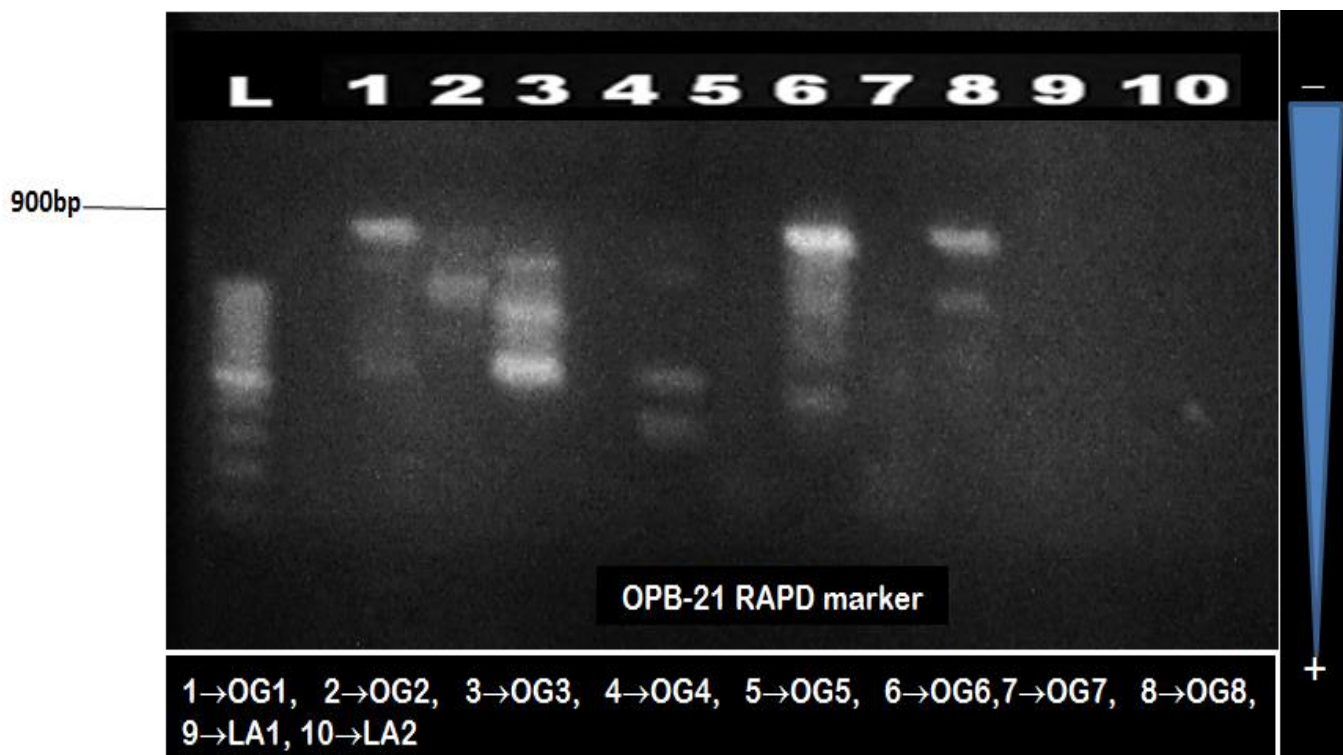

524

525 **Fig 6**

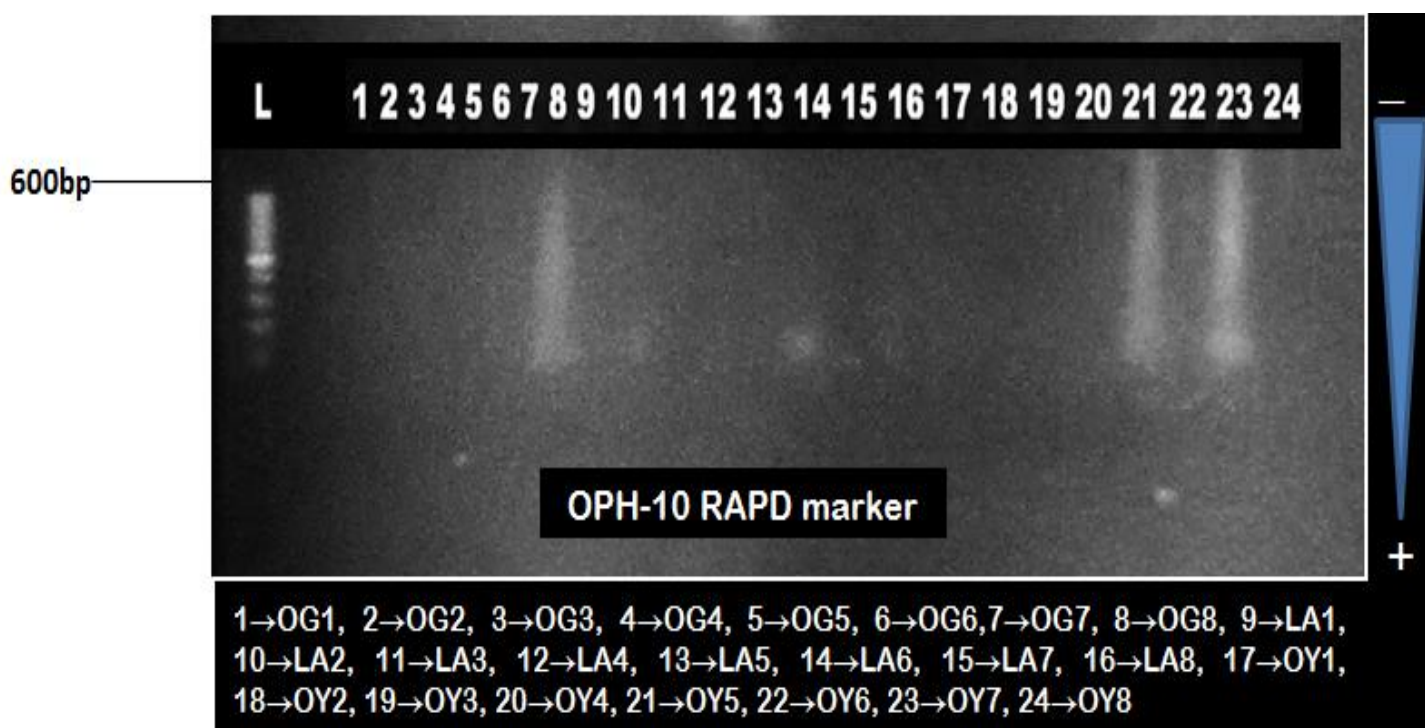

526

527 **Fig 7**

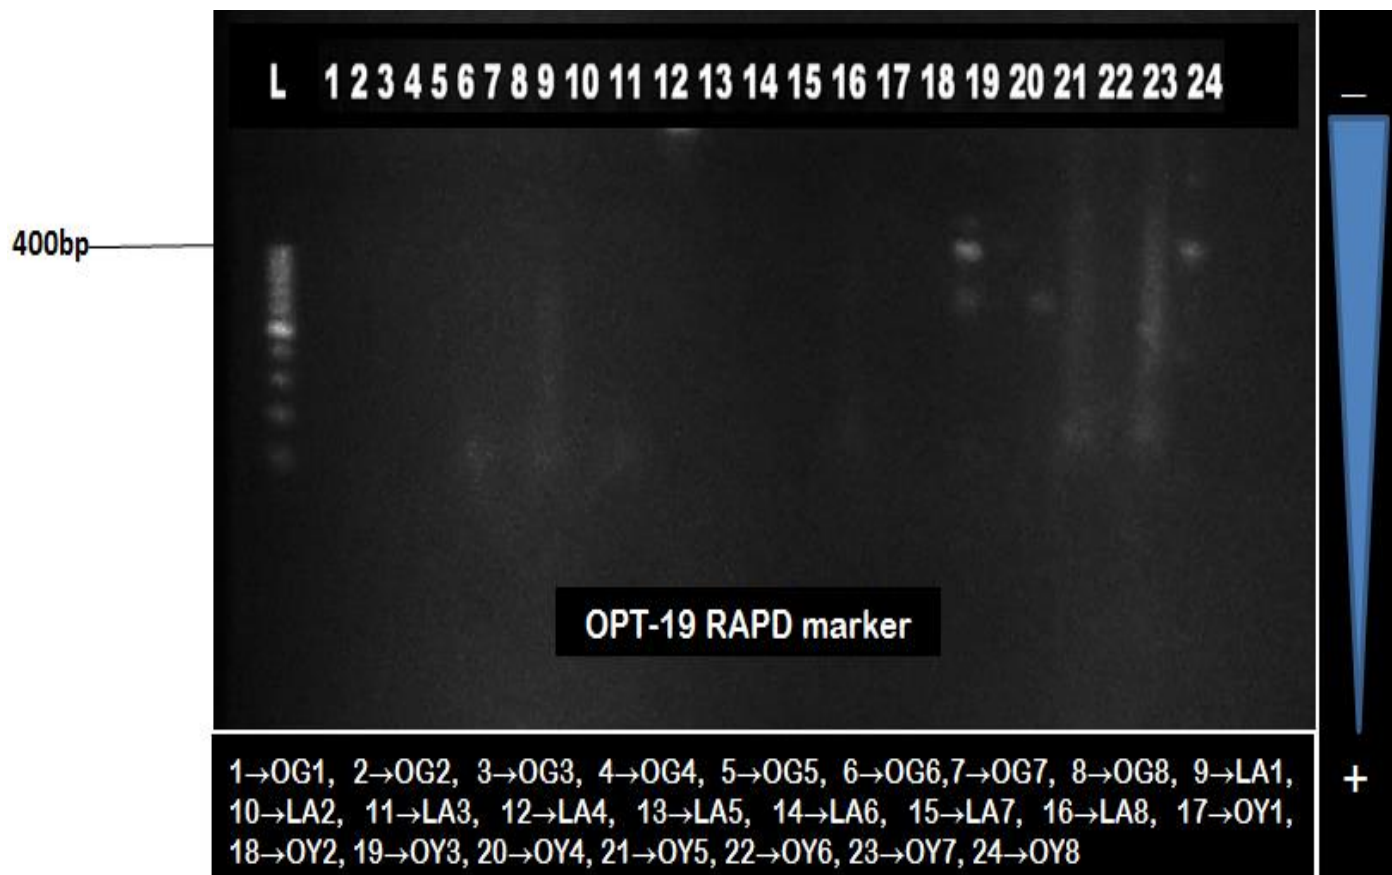

528

529 **Fig 8**

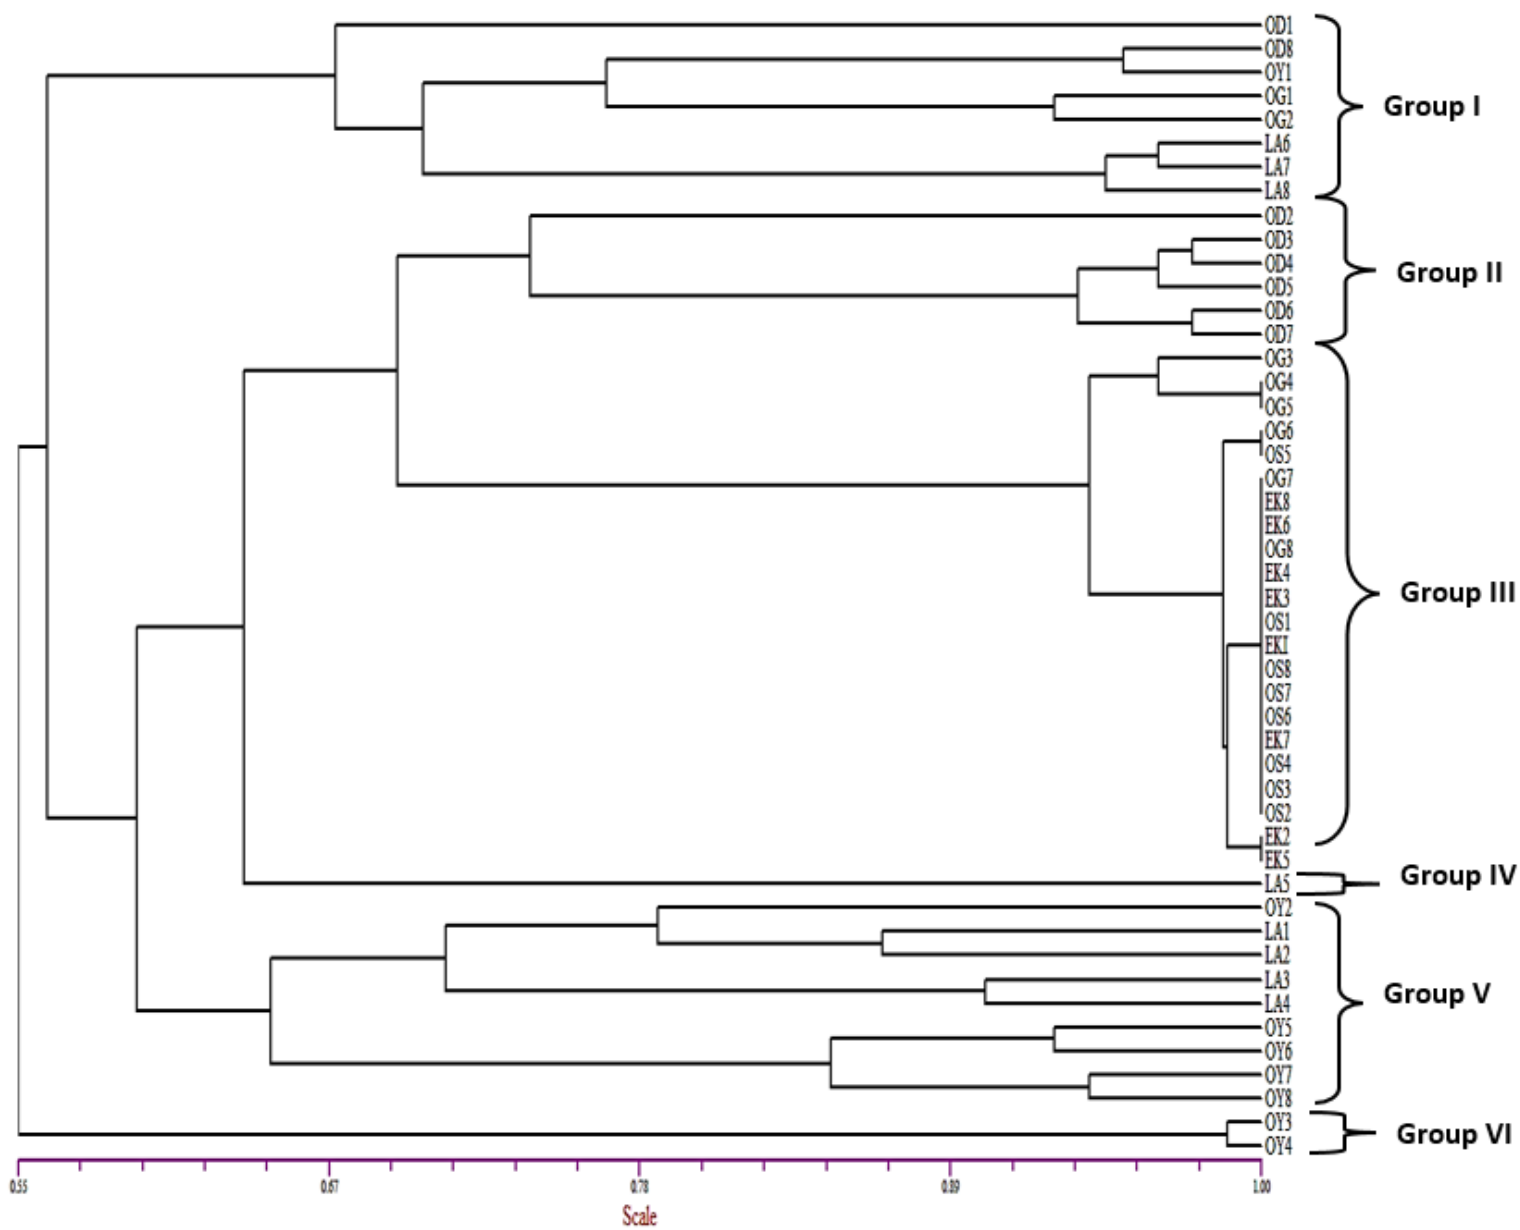

531 Fig 9
